# Supplementary material
Source: PubMed Central journal article supplement (PMC7938379)
Supplement: mmc1.pdf&service=browserrender&system=6 [file mmc1.pdf%26service%3Dbrowserrender%26system%3D6]

# THE LANCET

## **Supplementary appendix**

This appendix formed part of the original submission and has been peer reviewed.  
We post it as supplied by the authors.

Supplement to: Voysey M, Clemens SAC, Madhi SA, et al. Single-dose administration and the influence of the timing of the booster dose on immunogenicity and efficacy of ChAdOx1 nCoV-19 (AZD1222) vaccine: a pooled analysis of four randomised trials. *Lancet* 2021; published online Feb 19. [http://dx.doi.org/10.1016/S0140-6736\(21\)00432-3](http://dx.doi.org/10.1016/S0140-6736(21)00432-3).

## Supplementary File

### Table of Contents

|           |                                                                                                                                                                     |        |
|-----------|---------------------------------------------------------------------------------------------------------------------------------------------------------------------|--------|
| Figure S1 | CONSORT diagram .....                                                                                                                                               | 2      |
| Table S1  | Baseline characteristics of primary efficacy analysis cohort .....                                                                                                  | 3      |
| Table S2  | Follow-up time (days) after 14 days post-booster dose in primary efficacy cohort, by country .....                                                                  | 4      |
| Table S3  | Hospitalisation for COVID-19 (Any dose population) .....                                                                                                            | 5      |
| Table S4  | Factors related to receipt of a booster dose .....                                                                                                                  | 6      |
| Figure S2 | Vaccine efficacy against asymptomatic/unknown infection by interval between first and second dose after, A) SD/SD or LD/SD, B) SD/SD, C) LD/SD administration ..... | 7      |
| Table S5  | SARS-CoV-2 anti-spike IgG responses by multiplex immunoassay at 28 days after a second dose, by prime-boost interval .....                                          | 9      |
| Figure S3 | Neutralising antibody 28 days after a booster dose, measured in pseudovirus assay (Monogram IC50) .....                                                             | 11     |
| Table S6  | Neutralising antibody 28 days after a booster dose, measured in pseudovirus assay (Monogram IC50) .....                                                             | 11     |
| Figure S4 | Kaplan-Meier cumulative incidence of primary symptomatic PCR+ cases after booster dose, in the primary efficacy cohort .....                                        | 12     |
| Figure S5 | Kaplan-Meier cumulative incidence of primary symptomatic PCR+ cases after booster dose in SD/SD cohorts, by country* .....                                          | 13     |
| Table S7  | Serious Adverse Events by System Organ Class and Preferred Term ....                                                                                                | 14     |
| Table S8  | Unsolicited Adverse Events by System Organ Class and Preferred Term (severity grade 3 or higher) .....                                                              | 19     |
|           | <br>The Oxford Trial Group List .....                                                                                                                               | <br>27 |
|           | Acknowledgements.....                                                                                                                                               | 52     |

**Figure S1 CONSORT diagram**

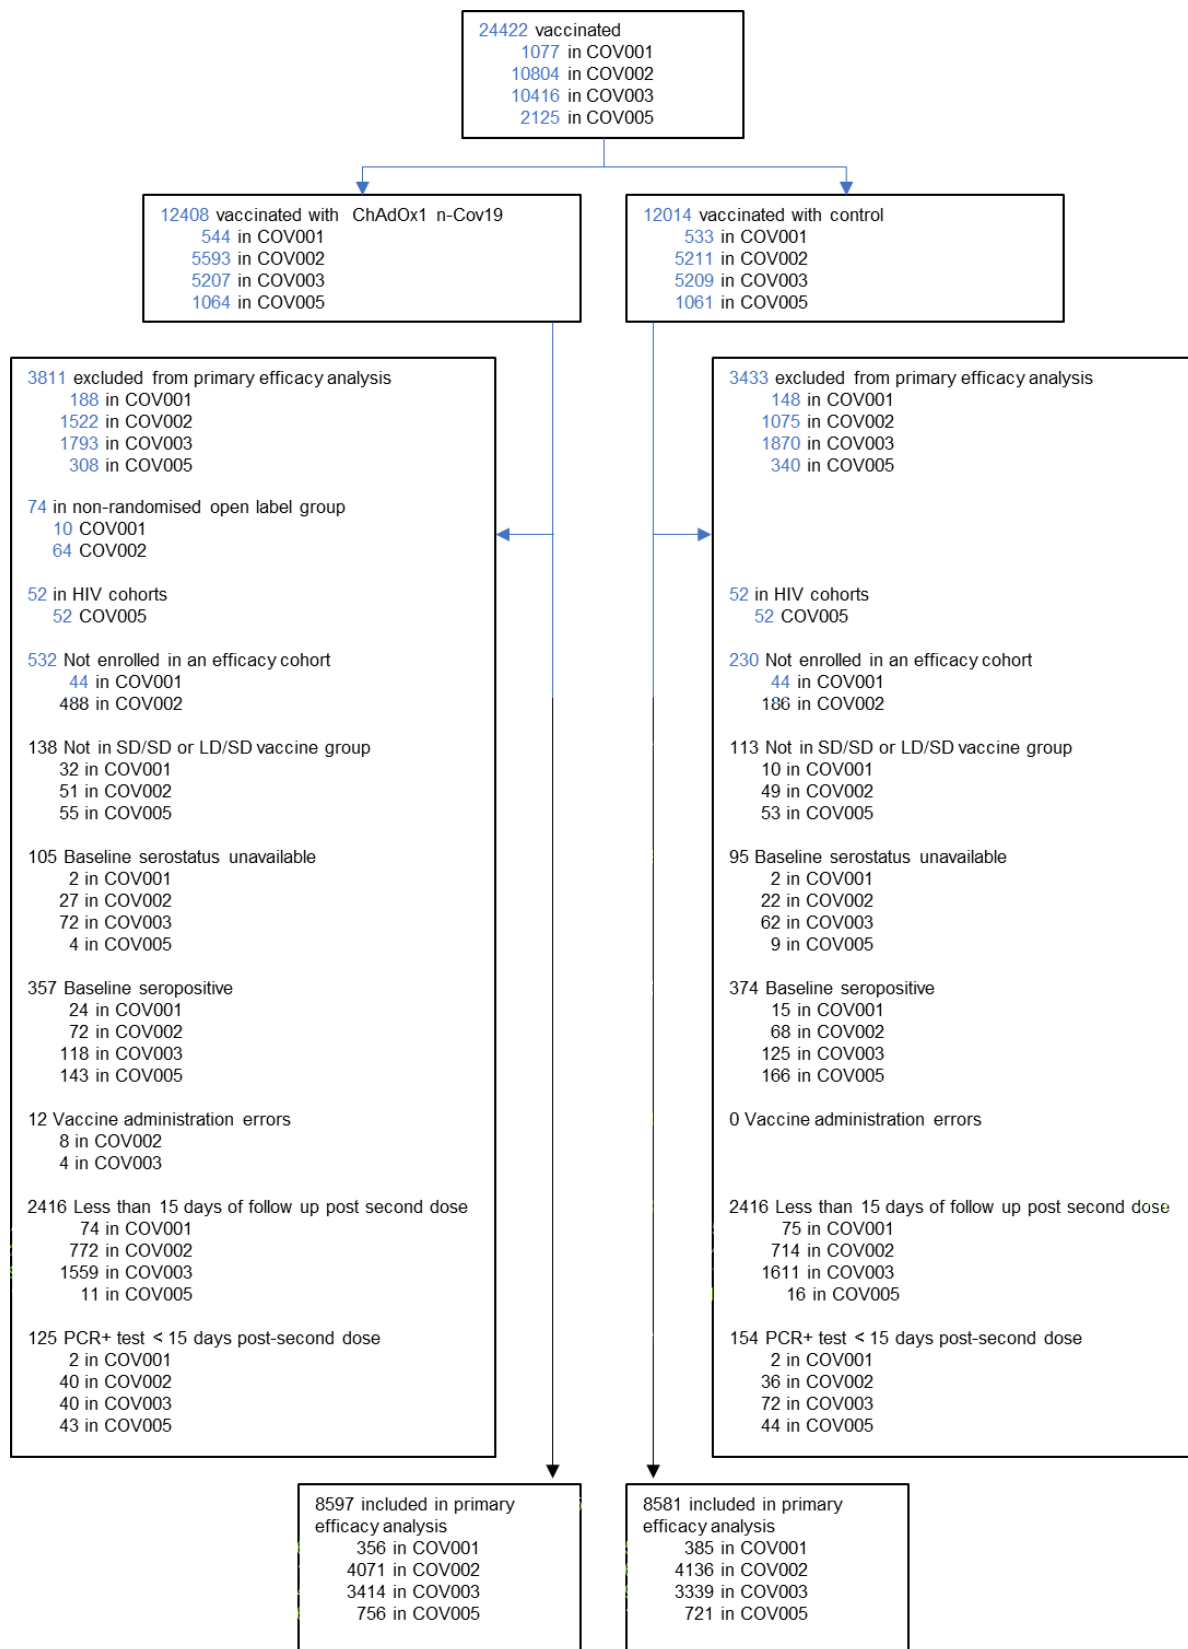

**Table S1 Baseline characteristics of primary efficacy analysis two-dose cohort**

| Characteristics                              | COV001 (UK)                   |                      | COV002 (UK)                    |                      | COV003 (Brazil)                |                     | COV005 (South Africa)         |                    |
|----------------------------------------------|-------------------------------|----------------------|--------------------------------|----------------------|--------------------------------|---------------------|-------------------------------|--------------------|
|                                              | ChAdOx1<br>nCoV-19<br>(n=356) | Control<br>(n=385)   | ChAdOx1<br>nCoV-19<br>(n=4071) | Control<br>(n=4136)  | ChAdOx1<br>nCoV-19<br>(n=3414) | Control<br>(n=3339) | ChAdOx1<br>nCoV-19<br>(n=756) | Control<br>(n=721) |
| Age                                          |                               |                      |                                |                      |                                |                     |                               |                    |
| 18-55 years                                  | 356 (100.0%)                  | 385 (100.0%)         | 3282 (80.6%)                   | 3334 (80.6%)         | 2850 (83.5%)                   | 2808 (84.1%)        | 719 (95.1%)                   | 679 (94.2%)        |
| 56-69 years                                  | 0 (0.0%)                      | 0 (0.0%)             | 377 (9.3%)                     | 378 (9.1%)           | 492 (14.4%)                    | 466 (14.0%)         | 37 (4.9%)                     | 42 (5.8%)          |
| ≥70 years                                    | 0 (0.0%)                      | 0 (0.0%)             | 412 (10.1%)                    | 424 (10.3%)          | 72 (2.1%)                      | 65 (1.9%)           | 0 (0.0%)£                     | 0 (0.0%)£          |
| missing                                      | 0 (0.0%)                      | 0 (0.0%)             | 0 (0.0%)                       | 0 (0.0%)             | 0 (0.0%)                       | 0 (0.0%)            | 0 (0.0%)                      | 0 (0.0%)           |
| Sex (female) n%                              | 174 (48.9%)                   | 201 (52.2%)          | 2395 (58.8%)                   | 2521 (61.0%)         | 1936 (56.7%)                   | 1839 (55.1%)        | 311 (41.1%)                   | 319 (44.2%)        |
| BMI (kg/m <sup>2</sup> )<br>median [IQR]     | 24.1 [22.3-<br>26.7]          | 24.4 [21.9-<br>26.9] | 25.4 [22.9-<br>28.7]           | 25.4 [22.9-<br>29.0] | 25.8 [23.2-29.2]               | 25.9 [23.2-29.4]    | 23.4 [20.4-<br>27.7]          | 23.5 [20.8-28.3]   |
| Ethnicity                                    |                               |                      |                                |                      |                                |                     |                               |                    |
| White                                        | 323 (90.7%)                   | 355 (92.2%)          | 3725 (91.5%)                   | 3815 (92.2%)         | 2273 (66.6%)                   | 2249 (67.4%)        | 114 (15.1%)                   | 121 (16.8%)        |
| Black                                        | 3 (0.8%)                      | 1 (0.3%)             | 23 (0.6%)                      | 17 (0.4%)            | 337 (9.9%)                     | 336 (10.1%)         | 510 (67.5%)                   | 466 (64.6%)        |
| Asian†                                       | 17 (4.8%)                     | 16 (4.2%)            | 220 (5.4%)                     | 203 (4.9%)           | 83 (2.4%)                      | 66 (2.0%)           |                               |                    |
| Mixed                                        | 6 (1.7%)                      | 7 (1.8%)             | 70 (1.7%)                      | 66 (1.6%)            | 704 (20.6%)                    | 670 (20.1%)         | 113 (14.9%)€                  | 117 (16.2%)€       |
| Other                                        | 7 (2.0%)                      | 6 (1.6%)             | 33 (0.8%)                      | 35 (0.8%)            | 17 (0.5%)                      | 18 (0.5%)           | 19 (2.5%)                     | 17 (2.4%)          |
| missing                                      | 0 (0.0%)                      | 0 (0.0%)             | 0 (0.0%)                       | 0 (0.0%)             | 0 (0.0%)                       | 0 (0.0%)            | 0 (0.0%)                      | 0 (0.0%)           |
| Health and social care<br>setting workers n% | 67 (18.8%)                    | 63 (16.4%)           | 2731 (67.1%)                   | 2825 (68.3%)         | 2526 (74.0%)                   | 2425 (72.6%)        | 64 (8.5%)                     | 79 (11.0%)         |
| Co-morbidities                               |                               |                      |                                |                      |                                |                     |                               |                    |
| Cardiovascular disease                       | 0 (0.0%)                      | 0 (0.0%)             | 476 (11.7%)                    | 468 (11.3%)          | 540 (15.8%)                    | 511 (15.3%)         | 24 (3.2%)                     | 20 (2.8%)          |
| Respiratory disease                          | 0 (0.0%)                      | 0 (0.0%)             | 489 (12.0%)                    | 525 (12.7%)          | 354 (10.4%)                    | 321 (9.6%)          | 29 (3.8%)                     | 20 (2.8%)          |
| Diabetes                                     | 0 (0.0%)                      | 0 (0.0%)             | 93 (2.3%)                      | 86 (2.1%)            | 141 (4.1%)                     | 113 (3.4%)          | 3 (0.4%)                      | 4 (0.6%)           |

† Asian not recorded as a category in South Africa. £ Maximum age at enrolment for eligibility was 65 years in South Africa. € This category recorded as 'Coloured' in original data.

**Table S2 Follow-up time (days) after 14 days post-booster dose in primary efficacy cohort, by country**

| Pooled data                             |            | ChAdOx1 nCoV-19    | Control            |
|-----------------------------------------|------------|--------------------|--------------------|
| Time between prime-boost SD/SD          | <6 weeks   | 54.0 [18.0, 81.0]  | 53.0 [17.0, 80.0]  |
|                                         | 6-8 weeks  | 83.0 [53.0, 97.0]  | 82.0 [52.0, 95.0]  |
|                                         | 9-11 weeks | 83.0 [67.0, 91.8]  | 84.0 [66.0, 92.0]  |
|                                         | ≥12 weeks  | 61.0 [54.0, 69.0]  | 62.0 [53.8, 69.0]  |
| Time between prime-boost SD/SD or LD/SD | <6 weeks   | 54.0 [18.0, 81.0]  | 53.0 [17.0, 80.0]  |
|                                         | 6-8 weeks  | 83.0 [53.0, 97.0]  | 83.0 [52.0, 95.0]  |
|                                         | 9-11 weeks | 90.0 [81.0, 96.0]  | 90.0 [80.0, 96.0]  |
|                                         | ≥12 weeks  | 67.0 [59.0, 82.0]  | 67.0 [56.0, 82.0]  |
| UK                                      |            | ChAdOx1 nCoV-19    | Control            |
| Time between prime-boost SD/SD          | <6 weeks   | 35.0 [21.0, 63.0]  | 35.0 [21.0, 63.0]  |
|                                         | 6-8 weeks  | 97.0 [89.0, 102.0] | 95.0 [59.0, 101.0] |
|                                         | 9-11 weeks | 89.0 [83.0, 95.0]  | 89.0 [82.0, 95.0]  |
|                                         | ≥12 weeks  | 63.0 [56.0, 69.2]  | 63.0 [55.0, 70.0]  |
| Time between prime-boost SD/SD or LD/SD | <6 weeks   | 35.0 [21.0, 63.0]  | 35.0 [21.0, 63.0]  |
|                                         | 6-8 weeks  | 97.0 [90.0, 102.0] | 95.0 [67.0, 101.0] |
|                                         | 9-11 weeks | 94.0 [88.0, 98.0]  | 92.0 [88.0, 97.0]  |
|                                         | ≥12 weeks  | 68.0 [59.0, 82.0]  | 68.0 [59.0, 82.0]  |
| Brazil                                  |            | ChAdOx1 nCoV-19    | Control            |
| Time between prime-boost SD/SD          | <6 weeks   | 35.0 [13.0, 80.0]  | 35.0 [13.0, 70.0]  |
|                                         | 6-8 weeks  | 68.0 [45.0, 83.0]  | 69.0 [47.0, 84.0]  |
|                                         | 9-11 weeks | 63.0 [53.0, 69.0]  | 61.0 [53.0, 69.0]  |
|                                         | ≥12 weeks  | 46.0 [39.0, 53.0]  | 45.0 [33.5, 52.0]  |
| South Africa                            |            | ChAdOx1 nCoV-19    | Control            |
| Time between prime-boost SD/SD          | <6 weeks   | 81.0 [63.0, 91.0]  | 80.0 [63.0, 90.0]  |
|                                         | 6-8 weeks  | 62.0 [52.0, 62.0]  | 61.0 [53.0, 63.0]  |
|                                         | 9-11 weeks | 30.5 [23.8, 33.5]  | 55.0 [46.0, 55.0]  |
|                                         | ≥12 weeks  | -                  | -                  |
| Time between prime-boost SD/SD or LD/SD | <6 weeks   | 81.0 [63.0, 91.0]  | 80.0 [63.0, 90.0]  |
|                                         | 6-8 weeks  | 62.0 [52.0, 62.0]  | 61.0 [52.0, 63.0]  |
|                                         | 9-11 weeks | 30.5 [23.8, 33.5]  | 55.0 [46.0, 55.0]  |
|                                         | ≥12 weeks  | -                  | -                  |

Follow-up time presented as median [IQR] in days from 15 days after booster dose until the first occurrence of either withdrawal, PCR+ event, or date of data lock.

**Table S3 Hospitalisation for COVID-19 (Any dose efficacy population)**

|                                                                    | <b>N cases</b> | <b>ChAdOx1<br/>nCoV-19<br/>N=11794</b> | <b>Control<br/>N=11776</b> |
|--------------------------------------------------------------------|----------------|----------------------------------------|----------------------------|
| < 22 days after a single dose                                      | 9              | 2                                      | 7                          |
| >= 22 days after the first dose and < 15<br>days post booster dose | 6              | 0                                      | 6                          |
| >= 15 days post booster dose                                       | 9              | 0                                      | 9                          |

\*>=22 days after first dose, 0 vs 15 cases, VE: 100%, (97.5% one-sided CI 72.2%, NE). Estimate determined from stratified Poisson regression with Exact Conditional Method. NE: Not evaluated.

**Table S4 Factors related to receipt of a booster dose**

|                                                                         | <b>Participants who<br/>received booster<br/>N=19150</b> | <b>Participants who<br/>were not boosted<br/>N=2752</b> | <b>P value*</b> |
|-------------------------------------------------------------------------|----------------------------------------------------------|---------------------------------------------------------|-----------------|
| Age, median [IQR]                                                       | 40.0 [30.1, 52.0]                                        | 36.3 [28.0, 48.0]                                       | <0.001          |
| 18 – 55 years, n (%)                                                    | 15841/19150 (82.7%)                                      | 2377/2752 (86.4%)                                       | <0.001          |
| 56 – 69 years, n (%)                                                    | 2218/19150 (11.6%)                                       | 247/2752 (9.0%)                                         |                 |
| ≥70 years, n (%)                                                        | 1091/19150 (5.7%)                                        | 128/2752 (4.7%)                                         |                 |
|                                                                         |                                                          |                                                         |                 |
| Sex                                                                     |                                                          |                                                         |                 |
| Female, n (%)                                                           | 10679/19150 (55.8%)                                      | 1680/2752 (61.0%)                                       | <0.001          |
| Male, n (%)                                                             | 8471/19150 (44.2%)                                       | 1072/2752 (39.0%)                                       |                 |
|                                                                         |                                                          |                                                         |                 |
| Health or social care worker, n (%)                                     | 11518/19150 (60.1%)                                      | 1809/2752 (65.7%)                                       | <0.001          |
|                                                                         |                                                          |                                                         |                 |
| Dose group (COV002 only)                                                |                                                          |                                                         |                 |
| SD, n (%)                                                               | 5782/8676 (66.6%)                                        | 693/1173 (59.1%)                                        | <0.001          |
| LD, n (%)                                                               | 2894/8676 (33.4%)                                        | 480/1173 (40.9%)                                        |                 |
|                                                                         |                                                          |                                                         |                 |
| Country (single SD cohort only)                                         |                                                          |                                                         |                 |
| UK (SD), n (%)                                                          | 6566/16222 (40.5%)                                       | 838/2272 (36.9%)                                        | <0.001          |
| Brazil (SD), n (%)                                                      | 8194/16222 (50.5%)                                       | 1389/2272 (61.1%)                                       |                 |
| South Africa (SD), n (%)                                                | 1462/16222 (9.0%)                                        | 45/2272 (2.0%)                                          |                 |
|                                                                         |                                                          |                                                         |                 |
| Ethnicity                                                               |                                                          |                                                         |                 |
| White, n (%)                                                            | 14532/19150 (75.9%)                                      | 2180/2751 (79.2%)                                       | <0.001          |
| Non-white, n (%)                                                        | 4615/19150 (24.1%)                                       | 571/2751 (20.8%)                                        |                 |
|                                                                         |                                                          |                                                         |                 |
| Follow-up time from 21 days after prime vaccination, days, median [IQR] | 20.0 [10.0, 58.0]                                        | 90.0 [23.0, 157.0]                                      | <0.001          |

\*p-values from Chi-squared tests, Wilcoxon Rank Sum tests (continuous age and follow-up time) and Cochran-Armitage tests (ordinal age groups).

**Figure S2 Vaccine efficacy against asymptomatic/unknown infection by interval between first and second dose after, A) SD/SD or LD/SD, B) SD/SD, C) LD/SD administration**

**A) SD/SD or LD/SD**

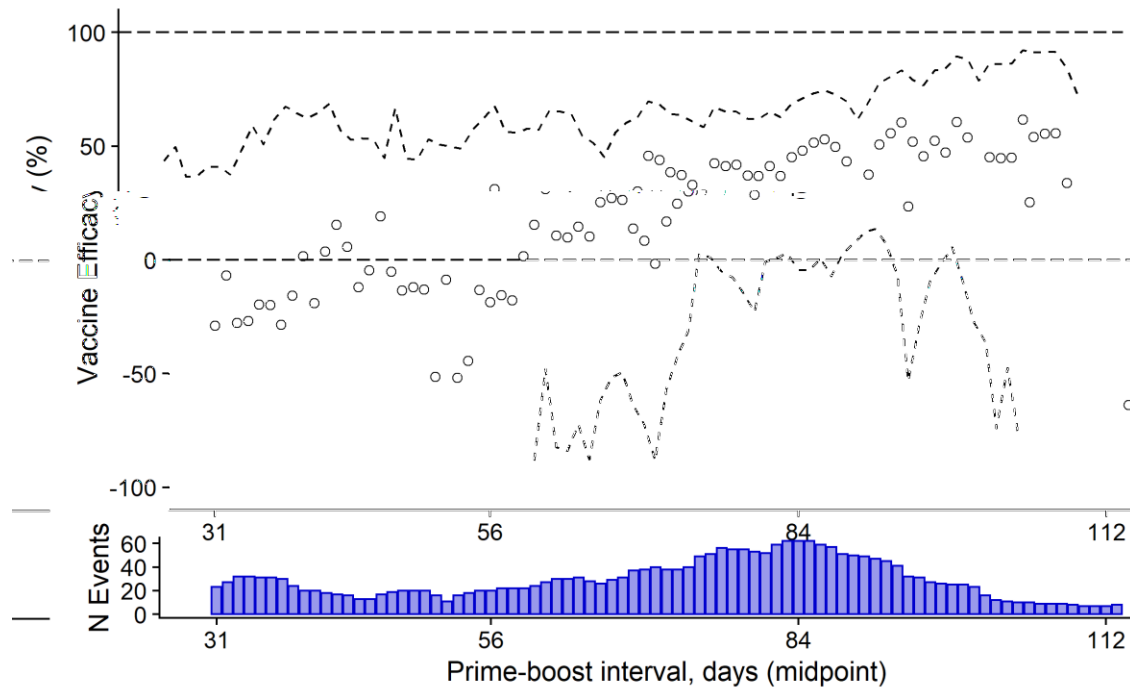

**B) SD/SD**

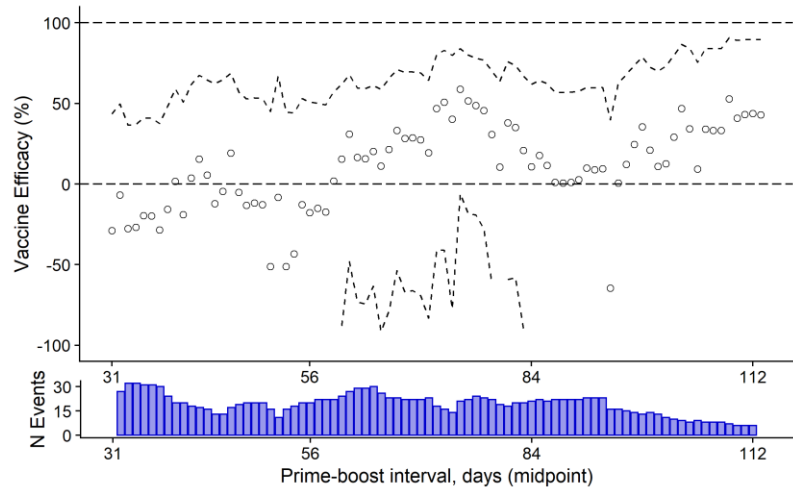

**C) LD/SD**

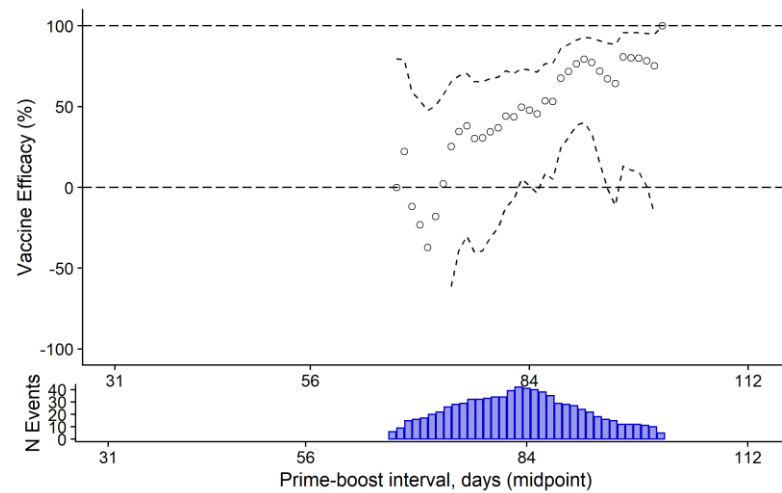



Each dot represents one estimate of vaccine efficacy in a subset of participants who received two doses of vaccine with a gap between first and second dose within a 20 day range. The x axis shows the midpoint of the 20 day range for dosing. Dotted lines show 95% confidence intervals for each dot point estimate of VE. Solid line shows a cubic spline smooth function for VE.

**Table S5 SARS-CoV-2 anti-spike IgG responses by multiplex immunoassay at 28 days after a second dose, by prime-boost interval**

| Age group               | Study                       | Prime-boost interval | ChAdOx1 nCoV-19 |                       |                      |                    | Control |              |              |                   |
|-------------------------|-----------------------------|----------------------|-----------------|-----------------------|----------------------|--------------------|---------|--------------|--------------|-------------------|
|                         |                             |                      | N               | Median [IQR]          | GMT (95% CI)         | GMR (95% CI)       | N       | Median [IQR] | GMT (95% CI) | GMR (95% CI)      |
| 18-55 years             | Overall (SD/SD)             | <6 weeks             | 332             | 23173 [11665, 43633]  | 21966 (19753, 24427) | ref                | 318     | 62 [16, 135] | 74 (63, 86)  | ref               |
|                         |                             | 6-8 weeks            | 287             | 30743 [18448, 52217]  | 29294 (26178, 32781) | 1.33 (1.16, 1.54)  | 196     | 56 [16, 169] | 71 (58, 86)  | 0.96 (0.75, 1.24) |
|                         |                             | 9-11 weeks           | 333             | 36044 [22647, 60646]  | 36946 (34010, 40135) | 1.68 (1.46, 1.93)  | 233     | 51 [16, 101] | 62 (51, 75)  | 0.84 (0.66, 1.06) |
|                         |                             | ≥12 weeks            | 289             | 51291 [28597, 93521]  | 50918 (45842, 56556) | 2.32 (2.01, 2.68)  | 173     | 53 [16, 98]  | 56 (47, 66)  | 0.76 (0.58, 0.98) |
|                         | Overall (SD/SD and LD/SD)   | <6 weeks             | 335             | 23241 [11750, 43560]  | 21967 (19772, 24406) | ref                | 323     | 62 [16, 135] | 74 (63, 86)  | ref               |
|                         |                             | 6-8 weeks            | 288             | 30719 [18263, 52216]  | 29244 (26142, 32714) | 1.33 (1.15, 1.54)  | 196     | 56 [16, 169] | 71 (58, 86)  | 0.97 (0.76, 1.23) |
|                         |                             | 9-11 weeks           | 460             | 36468 [22276, 62523]  | 36177 (33417, 39165) | 1.65 (1.44, 1.88)  | 324     | 48 [16, 95]  | 57 (49, 67)  | 0.78 (0.63, 0.96) |
|                         |                             | ≥12 weeks            | 445             | 51005 [29002, 88849]  | 48961 (44880, 53413) | 2.23 (1.95, 2.54)  | 271     | 46 [16, 87]  | 51 (44, 58)  | 0.69 (0.55, 0.85) |
| ≥56 years               | Overall (SD/SD)             | <6 weeks             | 282             | 20328 [10534, 35685]  | 18859 (16900, 21046) | ref                | 273     | 34 [16, 78]  | 40 (35, 46)  | ref               |
|                         |                             | 6-8 weeks            | 66              | 23659 [13620, 37338]  | 23809 (20039, 28288) | 1.26 (0.99, 1.61)  | 66      | 39 [16, 79]  | 43 (33, 56)  | 1.07 (0.80, 1.43) |
|                         |                             | 9-11 weeks           | 4               | 26374 [22367, 28102]  | 23432 (14885, 36887) | 1.24 (0.51, 3.01)  | 3       | 16 [16, 16]  | 16 (16, 16)  | 0.41 (0.12, 1.41) |
|                         |                             | ≥12 weeks            | 1               | 39443                 | 39443                | 2.09 (0.36, 12.15) | 0       | -            | -            | -                 |
|                         | Overall (SD/SD and LD/SD)   | <6 weeks             | 282             | 20328 [10534, 35685]  | 18859 (16900, 21046) | ref                | 273     | 34 [16, 78]  | 40 (35, 46)  | ref               |
|                         |                             | 6-8 weeks            | 66              | 23659 [13620, 37338]  | 23809 (20039, 28288) | 1.26 (0.99, 1.61)  | 66      | 39 [16, 79]  | 43 (33, 56)  | 1.07 (0.80, 1.43) |
|                         |                             | 9-11 weeks           | 4               | 26374 [22367, 28102]  | 23432 (14885, 36887) | 1.24 (0.51, 3.01)  | 3       | 16 [16, 16]  | 16 (16, 16)  | 0.41 (0.12, 0.41) |
|                         |                             | ≥12 weeks            | 1               | 39443                 | 39443                | 2.09 (0.36, 12.15) | 0       | -            | -            | -                 |
| Country Level Estimates |                             |                      |                 |                       |                      |                    |         |              |              |                   |
| 18-55 years             | COV001 (UK) SD/SD           | ≥12 weeks            | 92              | 71270 [43306, 129621] | 76070 (62987, 91872) |                    | 52      | 47 [16, 120] | 52 (37, 73)  |                   |
|                         |                             | <6 weeks             | 33              | 12828 [8605, 31356]   | 13463 (9248, 19599)  |                    | 24      | 16 [16, 50]  | 38 (21, 67)  |                   |
|                         |                             | 6-8 weeks            | 162             | 30849 [18421, 48794]  | 28832 (25094, 33128) |                    | 81      | 38 [16, 113] | 52 (39, 70)  |                   |
|                         |                             | 9-11 weeks           | 248             | 36649 [22504, 63378]  | 37694 (34394, 41310) |                    | 156     | 48 [16, 96]  | 54 (44, 66)  |                   |
|                         | COV002 (UK) LD/SD           | ≥12 weeks            | 191             | 43938 [24792, 76664]  | 42401 (37674, 47722) |                    | 114     | 57 [16, 92]  | 57 (46, 69)  |                   |
|                         |                             | 6-8 weeks            | 1               | 17871                 | 17871                |                    | 0       | -            | -            |                   |
|                         |                             | 9-11 weeks           | 127             | 39670 [21068, 66338]  | 34236 (28304, 41412) |                    | 91      | 39 [16, 86]  | 47 (37, 60)  |                   |
|                         |                             | ≥12 weeks            | 156             | 49584 [31122, 81163]  | 45533 (38988, 53177) |                    | 98      | 39 [16, 72]  | 43 (35, 52)  |                   |
|                         | COV003 (Brazil) SD/SD       | <6 weeks             | 211             | 21006 [11638, 37206]  | 20542 (18162, 23233) |                    | 203     | 70 [34, 154] | 81 (67, 98)  |                   |
|                         |                             | 6-8 weeks            | 116             | 27187 [16548, 55060]  | 28649 (23497, 34930) |                    | 113     | 76 [40, 206] | 90 (69, 117) |                   |
|                         |                             | 9-11 weeks           | 85              | 31871 [22997, 53258]  | 34847 (28912, 42000) |                    | 77      | 60 [16, 102] | 81 (54, 122) |                   |
|                         |                             | ≥12 weeks            | 6               | 56933 [27600, 92280]  | 36630 (8849, 151637) |                    | 7       | 95 [16, 100] | 73 (14, 394) |                   |
|                         | COV005 (South Africa) SD/SD | <6 weeks             | 88              | 36010 [19167, 62937]  | 30994 (24921, 38547) |                    | 91      | 54 [16, 112] | 71 (52, 99)  |                   |
|                         |                             | 6-8 weeks            | 9               | 56458 [39228, 63942]  | 51943 (34155, 78995) |                    | 2       | 28 [22, 33]  | 25 (0, 5993) |                   |

|           |                             |            |     |                      |                      |  |     |                |                |  |
|-----------|-----------------------------|------------|-----|----------------------|----------------------|--|-----|----------------|----------------|--|
|           | COV005 (South Africa) LD/SD | <6 weeks   | 3   | 24956 [19684, 27528] | 22121 (8548, 57250)  |  | 5   | 115 [16, 172]  | 65 (13, 319)   |  |
| ≥56 years | COV002 (UK) SD/SD           | <6 weeks   | 203 | 19806 [11647, 33898] | 19182 (17056, 21572) |  | 202 | 25 [16, 72]    | 38 (33, 45)    |  |
|           |                             | 6-8 weeks  | 59  | 22735 [12978, 35102] | 22696 (18950, 27183) |  | 64  | 35 [16, 72]    | 41 (32, 52)    |  |
|           |                             | 9-11 weeks | 4   | 26374 [22367, 28102] | 23432 (14885, 36887) |  | 3   | 16 [16, 16]    | 16 (16, 16)    |  |
|           | COV002 (UK) LD/SD           | ≥12 weeks  | 1   | 39443                | 39443                |  | 0   | -              | -              |  |
|           |                             |            |     |                      |                      |  |     |                |                |  |
|           | COV003 (Brazil) SD/SD       | <6 weeks   | 75  | 21027 [8645, 38450]  | 17309 (13389, 22377) |  | 67  | 37 [16, 82]    | 43 (33, 56)    |  |
|           |                             | 6-8 weeks  | 6   | 31811 [22330, 38513] | 32632 (15397, 69159) |  | 2   | 269 [236, 302] | 261 (11, 6286) |  |
|           | COV005 (South Africa) SD/SD | <6 weeks   | 4   | 49068 [38190, 79322] | 39899 (4506, 353262) |  | 4   | 345 [83, 618]  | 164 (10, 2691) |  |
|           |                             | 6-8 weeks  | 1   | 60514                | 60514                |  | 0   | -              | -              |  |

**Figure S3 Neutralising antibody 28 days after a booster dose, measured in pseudovirus assay (Monogram IC50)**

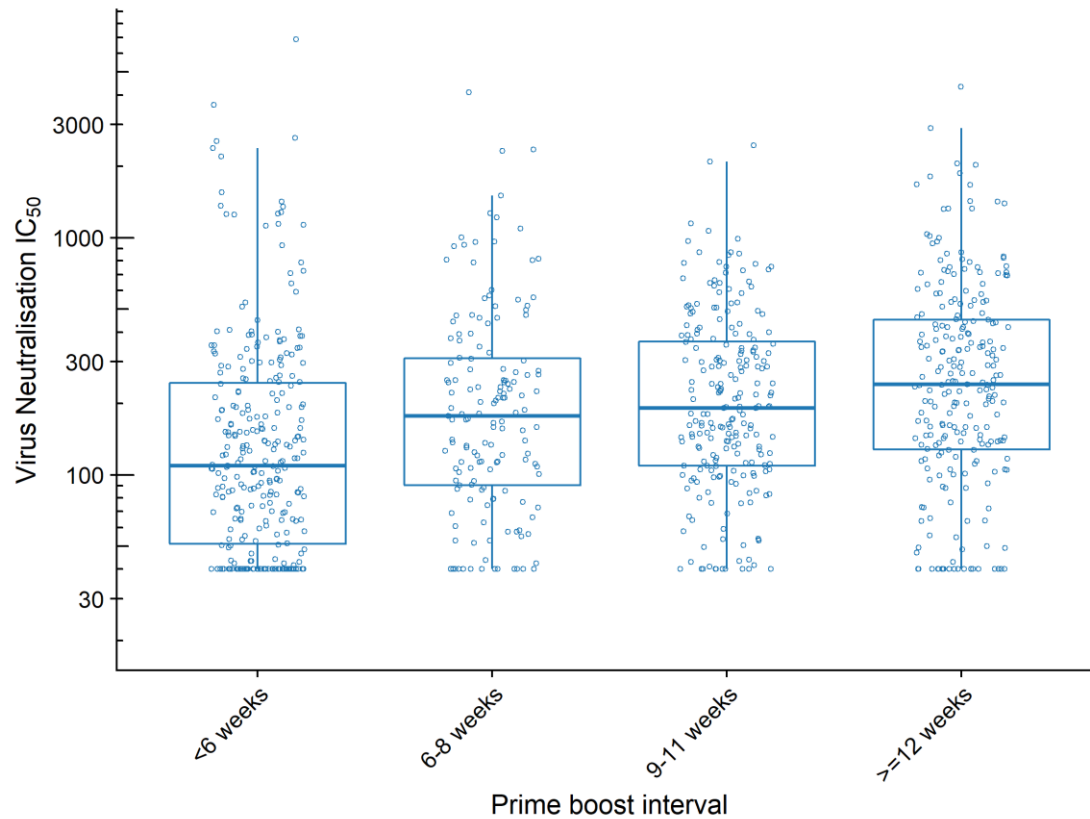

Participants who were PCR+ prior to the blood sample taken at day 28 post boost were removed from the analyses.  
Analysis includes SD/SD and LD/SD recipients.

**Table S6 Neutralising antibody 28 days after a booster dose, measured in pseudovirus assay (Monogram IC50)**

| Prime-boost interval | N   | Median [IQR]   | GMT (95% CI)         | GMR (95% CI)      | P value |
|----------------------|-----|----------------|----------------------|-------------------|---------|
| <6 weeks             | 279 | 109 [51, 246]  | 127.8 (113.1, 144.3) | ref               | <0.0001 |
| 6-8 weeks            | 151 | 177 [90, 311]  | 182.7 (156.0, 214.1) | 1.43 (1.18, 1.74) |         |
| 9-11 weeks           | 224 | 191 [109, 367] | 198.1 (176.8, 221.9) | 1.55 (1.31, 1.84) |         |
| ≥12 weeks            | 239 | 241 [128,452]  | 237.0 (208.5, 269.4) | 1.85 (1.57, 2.20) |         |

**Figure S4 Kaplan-Meier cumulative incidence of primary symptomatic PCR+ cases after booster dose, in the primary efficacy cohort**

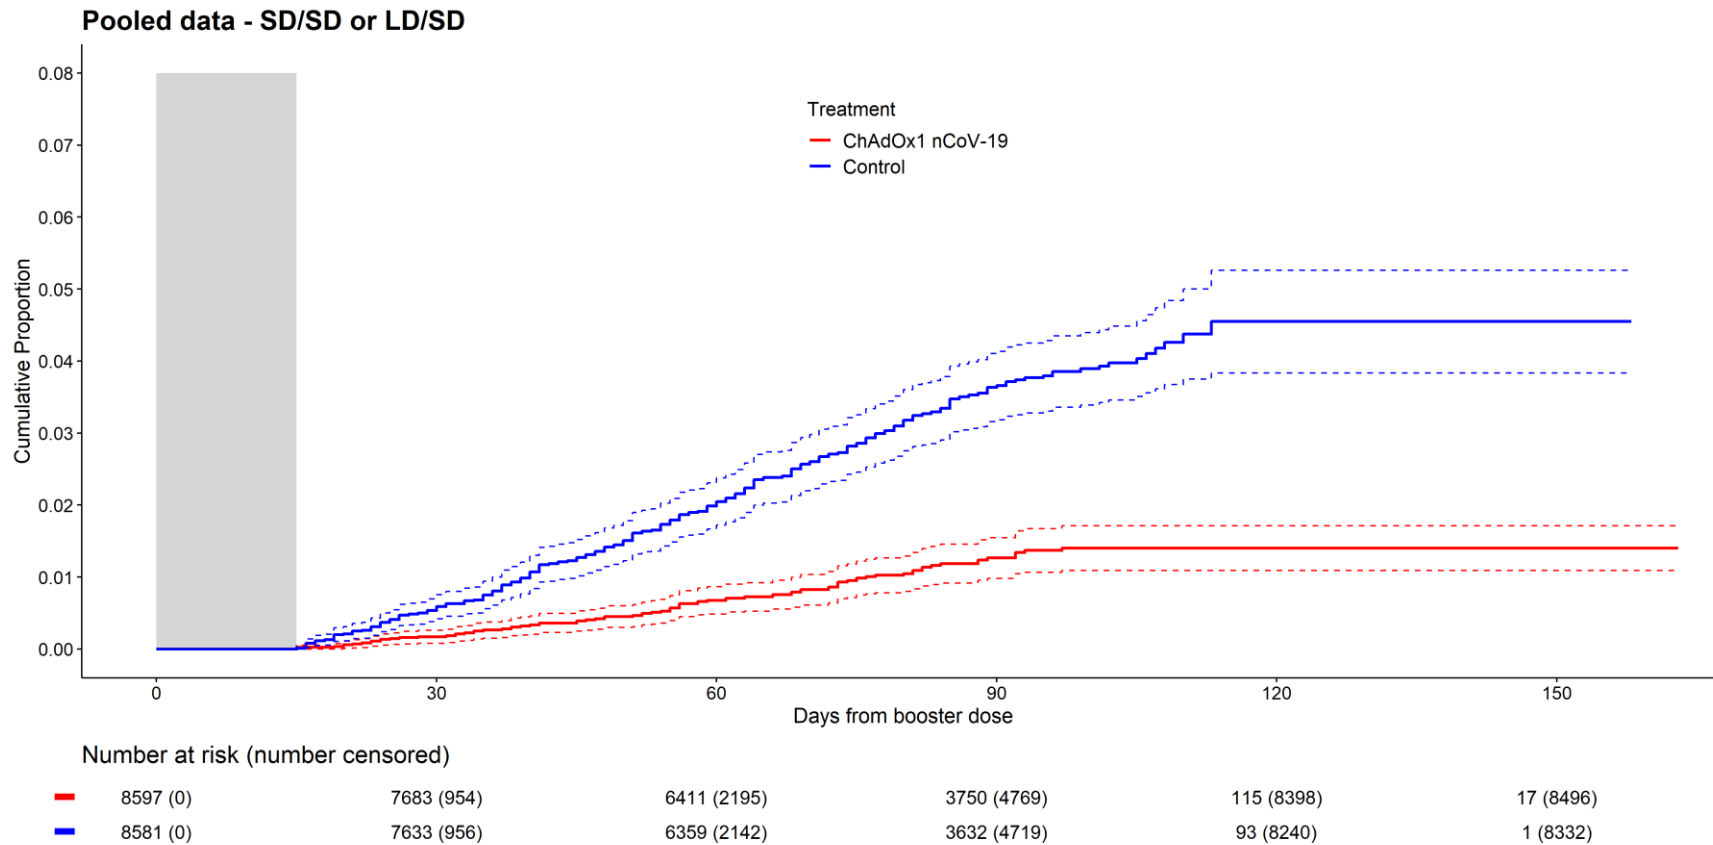

**Figure S5 Kaplan-Meier cumulative incidence of primary symptomatic PCR+ cases after booster dose in SD/SD cohorts, by country\***

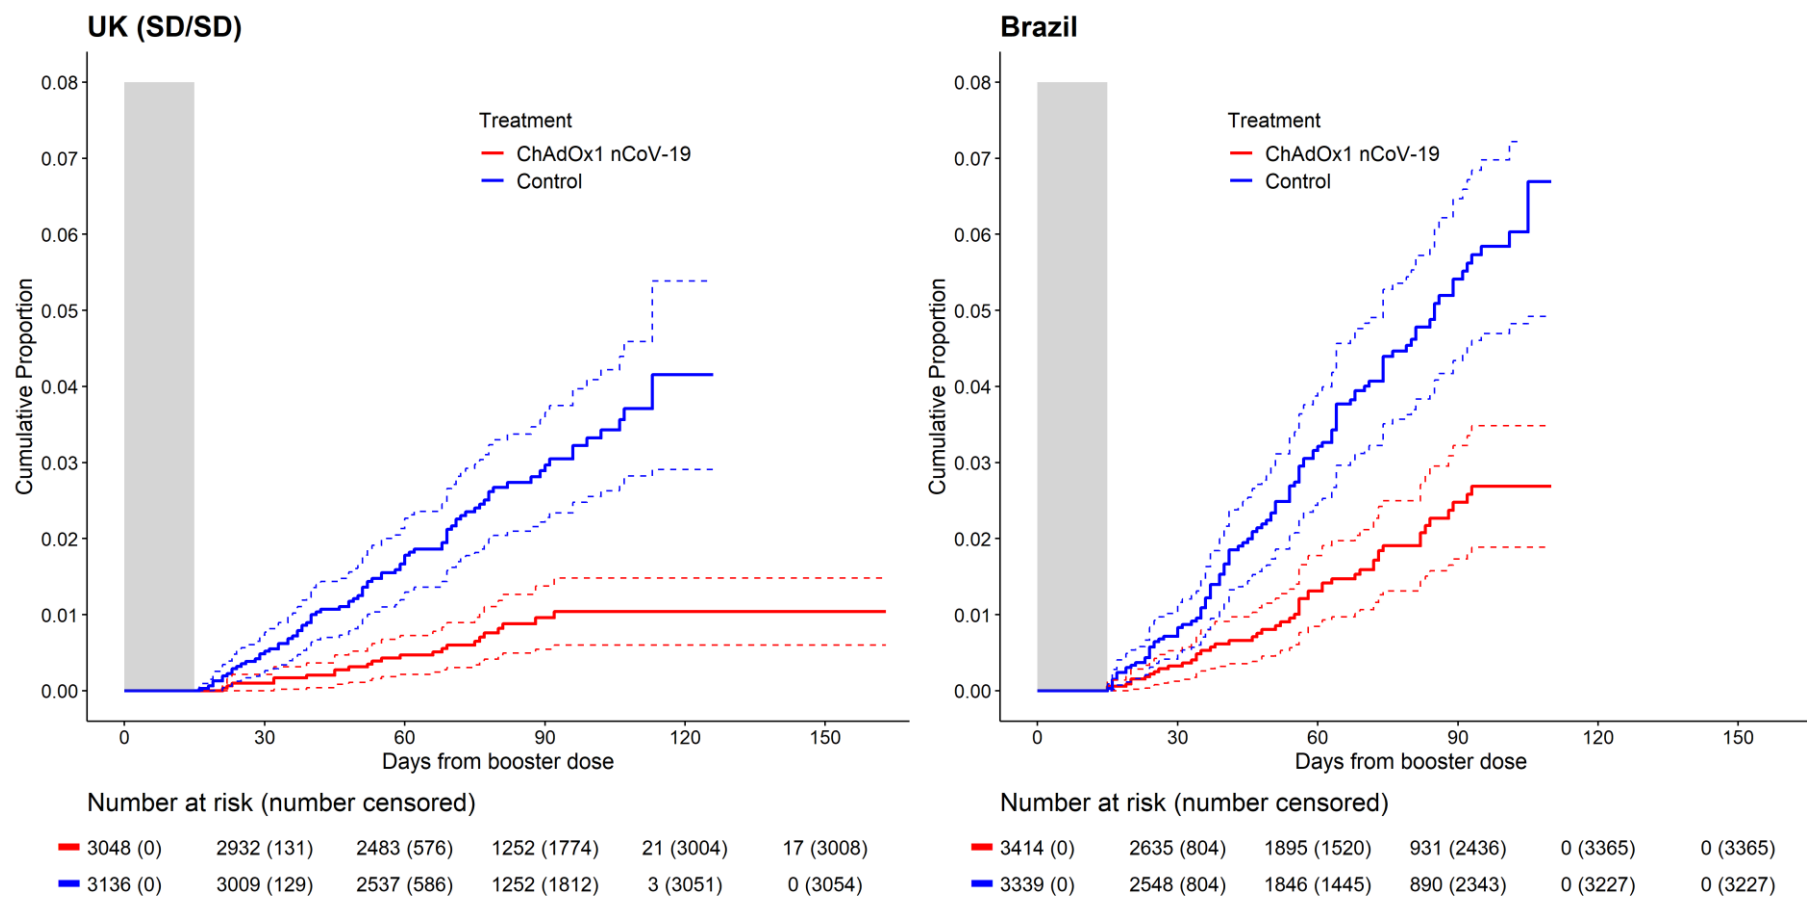

\*Kaplan-Meier curves for South Africa study not presented due to small number of cases contributing to the primary efficacy analysis.

**Table S7 Serious Adverse Events by System Organ Class and Preferred Term**

| System Organ Class <sup>a</sup><br>Preferred Term<br>(MedDRA version 23.1) | ChAdOx1 nCoV-19<br>(N = 12282) |            | Control<br>(N = 11962)    |            |
|----------------------------------------------------------------------------|--------------------------------|------------|---------------------------|------------|
|                                                                            | Number (%) of                  | Number of  | Number (%) of             | Number of  |
|                                                                            | Participants <sup>b</sup>      | Events     | Participants <sup>b</sup> | Events     |
| <b>Participants with any SAE</b>                                           | <b>108 (0.9)</b>               | <b>117</b> | <b>127 (1.1)</b>          | <b>131</b> |
| <b>Infections and infestations</b>                                         | <b>23 (0.2)</b>                | <b>26</b>  | <b>41 (0.3)</b>           | <b>41</b>  |
| Acute sinusitis                                                            | 0                              | 0          | 1 (<0.1)                  | 1          |
| Appendicitis                                                               | 6 (<0.1)                       | 6          | 7 (0.1)                   | 7          |
| Arthritis bacterial                                                        | 1 (<0.1)                       | 1          | 0                         | 0          |
| Biliary sepsis                                                             | 1 (<0.1)                       | 1          | 0                         | 0          |
| COVID-19                                                                   | 2 (<0.1)                       | 2          | 17 (0.1)                  | 17         |
| COVID-19 pneumonia                                                         | 0                              | 0          | 4 (<0.1)                  | 4          |
| Campylobacter colitis                                                      | 1 (<0.1)                       | 1          | 0                         | 0          |
| Cellulitis                                                                 | 1 (<0.1)                       | 1          | 0                         | 0          |
| Diverticulitis                                                             | 3 (<0.1)                       | 3          | 0                         | 0          |
| Gastroenteritis                                                            | 0                              | 0          | 1 (<0.1)                  | 1          |
| Haematoma infection                                                        | 0                              | 0          | 1 (<0.1)                  | 1          |
| Hepatitis infectious mononucleosis                                         | 1 (<0.1)                       | 1          | 0                         | 0          |
| Labyrinthitis                                                              | 0                              | 0          | 1 (<0.1)                  | 1          |
| Myelitis                                                                   | 0                              | 0          | 1 (<0.1)                  | 1          |
| Otitis externa                                                             | 1 (<0.1)                       | 1          | 0                         | 0          |
| Peritonitis                                                                | 0                              | 0          | 1 (<0.1)                  | 1          |
| Pilonidal cyst                                                             | 0                              | 0          | 2 (<0.1)                  | 2          |
| Pneumonia bacterial                                                        | 1 (<0.1)                       | 1          | 0                         | 0          |
| Pulmonary tuberculosis                                                     | 1 (<0.1)                       | 1          | 0                         | 0          |
| Pyelonephritis                                                             | 2 (<0.1)                       | 2          | 0                         | 0          |
| Pyelonephritis acute                                                       | 1 (<0.1)                       | 1          | 0                         | 0          |
| Respiratory tract infection fungal                                         | 1 (<0.1)                       | 1          | 0                         | 0          |
| Sepsis                                                                     | 0                              | 0          | 2 (<0.1)                  | 2          |
| Staphylococcal bacteraemia                                                 | 1 (<0.1)                       | 1          | 0                         | 0          |
| Subcutaneous abscess                                                       | 0                              | 0          | 1 (<0.1)                  | 1          |
| Tonsillitis                                                                | 0                              | 0          | 1 (<0.1)                  | 1          |
| Tuberculosis                                                               | 1 (<0.1)                       | 1          | 0                         | 0          |
| Tuberculosis of eye                                                        | 0                              | 0          | 1 (<0.1)                  | 1          |
| Urinary tract infection                                                    | 1 (<0.1)                       | 1          | 0                         | 0          |
| <b>Neoplasms benign, malignant and unspecified (incl cysts and polyps)</b> | <b>6 (&lt;0.1)</b>             | <b>6</b>   | <b>11 (0.1)</b>           | <b>11</b>  |
| Benign soft tissue neoplasm                                                | 1 (<0.1)                       | 1          | 0                         | 0          |
| Breast cancer                                                              | 1 (<0.1)                       | 1          | 0                         | 0          |
| Colorectal cancer metastatic                                               | 0                              | 0          | 1 (<0.1)                  | 1          |
| Haematological malignancy                                                  | 0                              | 0          | 1 (<0.1)                  | 1          |

|                                             |                    |           |                    |          |
|---------------------------------------------|--------------------|-----------|--------------------|----------|
| Intracranial haemangioma                    | 0                  | 0         | 1 (<0.1)           | 1        |
| Invasive ductal breast carcinoma            | 1 (<0.1)           | 1         | 0                  | 0        |
| Lip squamous cell carcinoma                 | 0                  | 0         | 1 (<0.1)           | 1        |
| Liposarcoma                                 | 0                  | 0         | 1 (<0.1)           | 1        |
| Lymphoplasmacytoid lymphoma/immunocytoma    | 0                  | 0         | 1 (<0.1)           | 1        |
| Malignant melanoma                          | 1 (<0.1)           | 1         | 1 (<0.1)           | 1        |
| Melanoma recurrent                          | 0                  | 0         | 1 (<0.1)           | 1        |
| Metastatic neoplasm                         | 1 (<0.1)           | 1         | 0                  | 0        |
| Ovarian germ cell teratoma benign           | 0                  | 0         | 1 (<0.1)           | 1        |
| Papillary renal cell carcinoma              | 1 (<0.1)           | 1         | 0                  | 0        |
| Papillary thyroid cancer                    | 0                  | 0         | 1 (<0.1)           | 1        |
| Uterine leiomyoma                           | 0                  | 0         | 1 (<0.1)           | 1        |
| <b>Blood and lymphatic system disorders</b> | <b>0</b>           | <b>0</b>  | <b>1 (&lt;0.1)</b> | <b>1</b> |
| Autoimmune haemolytic anaemia               | 0                  | 0         | 1 (<0.1)           | 1        |
| <b>Immune system disorders</b>              | <b>0</b>           | <b>0</b>  | <b>1 (&lt;0.1)</b> | <b>1</b> |
| Allergy to arthropod sting                  | 0                  | 0         | 1 (<0.1)           | 1        |
| <b>Metabolism and nutrition disorders</b>   | <b>0</b>           | <b>0</b>  | <b>1 (&lt;0.1)</b> | <b>1</b> |
| Diabetic ketoacidosis                       | 0                  | 0         | 1 (<0.1)           | 1        |
| <b>Psychiatric disorders</b>                | <b>3 (&lt;0.1)</b> | <b>3</b>  | <b>1 (&lt;0.1)</b> | <b>1</b> |
| Depression suicidal                         | 1 (<0.1)           | 1         | 0                  | 0        |
| Substance abuse                             | 1 (<0.1)           | 1         | 0                  | 0        |
| Substance-induced psychotic disorder        | 1 (<0.1)           | 1         | 1 (<0.1)           | 1        |
| <b>Nervous system disorders</b>             | <b>10 (0.1)</b>    | <b>10</b> | <b>8 (0.1)</b>     | <b>8</b> |
| Facial spasm                                | 1 (<0.1)           | 1         | 0                  | 0        |
| Hemiplegic migraine                         | 0                  | 0         | 1 (<0.1)           | 1        |
| Ischaemic stroke                            | 1 (<0.1)           | 1         | 0                  | 0        |
| Migraine                                    | 1 (<0.1)           | 1         | 0                  | 0        |
| Migraine with aura                          | 1 (<0.1)           | 1         | 0                  | 0        |
| Multiple sclerosis                          | 1 (<0.1)           | 1         | 0                  | 0        |
| Myelitis transverse                         | 1 (<0.1)           | 1         | 0                  | 0        |
| Presyncope                                  | 1 (<0.1)           | 1         | 0                  | 0        |
| Serotonin syndrome                          | 1 (<0.1)           | 1         | 0                  | 0        |
| Spinal cord compression                     | 1 (<0.1)           | 1         | 0                  | 0        |
| Subarachnoid haemorrhage                    | 0                  | 0         | 2 (<0.1)           | 2        |
| Syncope                                     | 0                  | 0         | 2 (<0.1)           | 2        |
| Transient ischaemic attack                  | 0                  | 0         | 3 (<0.1)           | 3        |
| VIIth nerve paralysis                       | 1 (<0.1)           | 1         | 0                  | 0        |
| <b>Eye disorders</b>                        | <b>2 (&lt;0.1)</b> | <b>2</b>  | <b>0</b>           | <b>0</b> |
| Retinal detachment                          | 1 (<0.1)           | 1         | 0                  | 0        |
| Retinal tear                                | 1 (<0.1)           | 1         | 0                  | 0        |



|                                                        |                    |           |                    |           |
|--------------------------------------------------------|--------------------|-----------|--------------------|-----------|
| <b>Cardiac disorders</b>                               | <b>7 (0.1)</b>     | <b>7</b>  | <b>10 (0.1)</b>    | <b>10</b> |
| Acute coronary syndrome                                | 0                  | 0         | 1 (<0.1)           | 1         |
| Acute myocardial infarction                            | 0                  | 0         | 2 (<0.1)           | 2         |
| Angina pectoris                                        | 2 (<0.1)           | 2         | 0                  | 0         |
| Angina unstable                                        | 1 (<0.1)           | 1         | 0                  | 0         |
| Atrial flutter                                         | 1 (<0.1)           | 1         | 0                  | 0         |
| Atrioventricular block complete                        | 1 (<0.1)           | 1         | 0                  | 0         |
| Atrioventricular block second degree                   | 0                  | 0         | 1 (<0.1)           | 1         |
| Cardiac failure congestive                             | 0                  | 0         | 1 (<0.1)           | 1         |
| Myocardial infarction                                  | 1 (<0.1)           | 1         | 1 (<0.1)           | 1         |
| Pericarditis                                           | 1 (<0.1)           | 1         | 2 (<0.1)           | 2         |
| Supraventricular tachycardia                           | 0                  | 0         | 1 (<0.1)           | 1         |
| Ventricular extrasystoles                              | 0                  | 0         | 1 (<0.1)           | 1         |
| <b>Vascular disorders</b>                              | <b>0</b>           | <b>0</b>  | <b>2 (&lt;0.1)</b> | <b>2</b>  |
| Deep vein thrombosis                                   | 0                  | 0         | 1 (<0.1)           | 1         |
| Peripheral ischaemia                                   | 0                  | 0         | 1 (<0.1)           | 1         |
| <b>Respiratory, thoracic and mediastinal disorders</b> | <b>1 (&lt;0.1)</b> | <b>1</b>  | <b>1 (&lt;0.1)</b> | <b>1</b>  |
| Dyspnoea                                               | 1 (<0.1)           | 1         | 0                  | 0         |
| Pulmonary embolism                                     | 0                  | 0         | 1 (<0.1)           | 1         |
| <b>Gastrointestinal disorders</b>                      | <b>15 (0.1)</b>    | <b>16</b> | <b>13 (0.1)</b>    | <b>13</b> |
| Abdominal pain                                         | 2 (<0.1)           | 2         | 1 (<0.1)           | 1         |
| Anal incontinence                                      | 0                  | 0         | 1 (<0.1)           | 1         |
| Constipation                                           | 0                  | 0         | 1 (<0.1)           | 1         |
| Diarrhoea                                              | 1 (<0.1)           | 1         | 0                  | 0         |
| Dyspepsia                                              | 1 (<0.1)           | 1         | 0                  | 0         |
| Enteritis                                              | 0                  | 0         | 1 (<0.1)           | 1         |
| Epiploic appendagitis                                  | 0                  | 0         | 1 (<0.1)           | 1         |
| Gastritis                                              | 1 (<0.1)           | 1         | 1 (<0.1)           | 1         |
| Gastrointestinal haemorrhage                           | 1 (<0.1)           | 1         | 0                  | 0         |
| Gastrooesophageal reflux disease                       | 0                  | 0         | 1 (<0.1)           | 1         |
| Haematemesis                                           | 0                  | 0         | 1 (<0.1)           | 1         |
| Incarcerated inguinal hernia                           | 1 (<0.1)           | 1         | 0                  | 0         |
| Intussusception                                        | 1 (<0.1)           | 1         | 0                  | 0         |
| Mesenteric vein thrombosis                             | 0                  | 0         | 1 (<0.1)           | 1         |
| Oesophageal spasm                                      | 1 (<0.1)           | 1         | 0                  | 0         |
| Pancreatitis                                           | 3 (<0.1)           | 3         | 0                  | 0         |
| Pancreatitis acute                                     | 1 (<0.1)           | 1         | 1 (<0.1)           | 1         |
| Small intestinal obstruction                           | 0                  | 0         | 2 (<0.1)           | 2         |
| Volvulus                                               | 2 (<0.1)           | 2         | 0                  | 0         |
| Vomiting                                               | 1 (<0.1)           | 1         | 1 (<0.1)           | 1         |
| <b>Hepatobiliary disorders</b>                         | <b>0</b>           | <b>0</b>  | <b>3 (&lt;0.1)</b> | <b>3</b>  |
| Cholelithiasis                                         | 0                  | 0         | 2 (<0.1)           | 2         |

|                                                             |                    |          |                    |          |
|-------------------------------------------------------------|--------------------|----------|--------------------|----------|
| Hepatic function abnormal                                   | 0                  | 0        | 1 (<0.1)           | 1        |
| <b>Skin and subcutaneous tissue disorders</b>               | <b>0</b>           | <b>0</b> | <b>1 (&lt;0.1)</b> | <b>1</b> |
| Angioedema                                                  | 0                  | 0        | 1 (<0.1)           | 1        |
| <b>Musculoskeletal and connective tissue disorders</b>      | <b>5 (&lt;0.1)</b> | <b>5</b> | <b>3 (&lt;0.1)</b> | <b>3</b> |
| Arthritis reactive                                          | 0                  | 0        | 1 (<0.1)           | 1        |
| Back pain                                                   | 1 (<0.1)           | 1        | 0                  | 0        |
| Costochondritis                                             | 0                  | 0        | 1 (<0.1)           | 1        |
| Intervertebral disc protrusion                              | 2 (<0.1)           | 2        | 0                  | 0        |
| Polymyalgia rheumatica                                      | 1 (<0.1)           | 1        | 0                  | 0        |
| Rhabdomyolysis                                              | 0                  | 0        | 1 (<0.1)           | 1        |
| Spinal pain                                                 | 1 (<0.1)           | 1        | 0                  | 0        |
| <b>Renal and urinary disorders</b>                          | <b>5 (&lt;0.1)</b> | <b>5</b> | <b>7 (0.1)</b>     | <b>7</b> |
| Acute kidney injury                                         | 1 (<0.1)           | 1        | 0                  | 0        |
| Calculus urethral                                           | 0                  | 0        | 1 (<0.1)           | 1        |
| Calculus urinary                                            | 2 (<0.1)           | 2        | 2 (<0.1)           | 2        |
| Nephrolithiasis                                             | 1 (<0.1)           | 1        | 2 (<0.1)           | 2        |
| Renal colic                                                 | 1 (<0.1)           | 1        | 0                  | 0        |
| Ureterolithiasis                                            | 0                  | 0        | 2 (<0.1)           | 2        |
| <b>Pregnancy, puerperium and perinatal conditions</b>       | <b>4 (&lt;0.1)</b> | <b>4</b> | <b>2 (&lt;0.1)</b> | <b>2</b> |
| Abortion incomplete                                         | 0                  | 0        | 1 (<0.1)           | 1        |
| Abortion spontaneous                                        | 2 (<0.1)           | 2        | 1 (<0.1)           | 1        |
| Hyperemesis gravidarum                                      | 1 (<0.1)           | 1        | 0                  | 0        |
| Pregnancy                                                   | 1 (<0.1)           | 1        | 0                  | 0        |
| <b>Reproductive system and breast disorders</b>             | <b>8 (0.1)</b>     | <b>9</b> | <b>2 (&lt;0.1)</b> | <b>2</b> |
| Adnexal torsion                                             | 2 (<0.1)           | 2        | 0                  | 0        |
| Endometriosis                                               | 2 (<0.1)           | 2        | 0                  | 0        |
| Genital pain                                                | 1 (<0.1)           | 1        | 0                  | 0        |
| Haemorrhagic ovarian cyst                                   | 2 (<0.1)           | 2        | 0                  | 0        |
| Pelvic pain                                                 | 0                  | 0        | 1 (<0.1)           | 1        |
| Uterine haemorrhage                                         | 1 (<0.1)           | 1        | 1 (<0.1)           | 1        |
| Vaginal haemorrhage                                         | 1 (<0.1)           | 1        | 0                  | 0        |
| <b>Congenital, familial and genetic disorders</b>           | <b>0</b>           | <b>0</b> | <b>1 (&lt;0.1)</b> | <b>1</b> |
| Arnold-Chiari malformation                                  | 0                  | 0        | 1 (<0.1)           | 1        |
| <b>General disorders and administration site conditions</b> | <b>4 (&lt;0.1)</b> | <b>4</b> | <b>2 (&lt;0.1)</b> | <b>2</b> |
| Chest pain                                                  | 1 (<0.1)           | 1        | 0                  | 0        |
| Influenza like illness                                      | 1 (<0.1)           | 1        | 0                  | 0        |
| Mass                                                        | 0                  | 0        | 1 (<0.1)           | 1        |

|                                                       |                    |           |                    |           |
|-------------------------------------------------------|--------------------|-----------|--------------------|-----------|
| Non-cardiac chest pain                                | 0                  | 0         | 1 (<0.1)           | 1         |
| Pyrexia                                               | 2 (<0.1)           | 2         | 0                  | 0         |
| <b>Investigations</b>                                 | <b>3 (&lt;0.1)</b> | <b>3</b>  | <b>1 (&lt;0.1)</b> | <b>1</b>  |
| C-reactive protein increased                          | 1 (<0.1)           | 1         | 1 (<0.1)           | 1         |
| Liver function test abnormal                          | 1 (<0.1)           | 1         | 0                  | 0         |
| Oxygen saturation decreased                           | 1 (<0.1)           | 1         | 0                  | 0         |
| <b>Injury, poisoning and procedural complications</b> | <b>15 (0.1)</b>    | <b>15</b> | <b>17 (0.1)</b>    | <b>18</b> |
| Animal bite                                           | 0                  | 0         | 1 (<0.1)           | 1         |
| Cervical vertebral fracture                           | 1 (<0.1)           | 1         | 0                  | 0         |
| Clavicle fracture                                     | 1 (<0.1)           | 1         | 0                  | 0         |
| Craniocerebral injury                                 | 1 (<0.1)           | 1         | 1 (<0.1)           | 1         |
| Fibula fracture                                       | 1 (<0.1)           | 1         | 0                  | 0         |
| Gun shot wound                                        | 1 (<0.1)           | 1         | 0                  | 0         |
| Injury                                                | 0                  | 0         | 1 (<0.1)           | 1         |
| Intentional overdose                                  | 0                  | 0         | 2 (<0.1)           | 2         |
| Joint dislocation                                     | 1 (<0.1)           | 1         | 1 (<0.1)           | 1         |
| Limb injury                                           | 1 (<0.1)           | 1         | 0                  | 0         |
| Lower limb fracture                                   | 0                  | 0         | 1 (<0.1)           | 2         |
| Meniscus injury                                       | 2 (<0.1)           | 2         | 0                  | 0         |
| Overdose                                              | 0                  | 0         | 1 (<0.1)           | 1         |
| Post procedural complication                          | 0                  | 0         | 1 (<0.1)           | 1         |
| Procedural nausea                                     | 1 (<0.1)           | 1         | 0                  | 0         |
| Radius fracture                                       | 0                  | 0         | 1 (<0.1)           | 1         |
| Road traffic accident                                 | 0                  | 0         | 2 (<0.1)           | 2         |
| Scapula fracture                                      | 1 (<0.1)           | 1         | 0                  | 0         |
| Synovial rupture                                      | 1 (<0.1)           | 1         | 0                  | 0         |
| Tendon injury                                         | 1 (<0.1)           | 1         | 0                  | 0         |
| Tendon rupture                                        | 1 (<0.1)           | 1         | 0                  | 0         |
| Thermal burn                                          | 1 (<0.1)           | 1         | 0                  | 0         |
| Traumatic lung injury                                 | 0                  | 0         | 1 (<0.1)           | 1         |
| Upper limb fracture                                   | 0                  | 0         | 2 (<0.1)           | 2         |
| Wrist fracture                                        | 0                  | 0         | 2 (<0.1)           | 2         |
| <b>Social circumstances</b>                           | <b>0</b>           | <b>0</b>  | <b>1 (&lt;0.1)</b> | <b>1</b>  |
| Homicide                                              | 0                  | 0         | 1 (<0.1)           | 1         |

**Table S8 Unsolicited Adverse Events by System Organ Class and Preferred Term (severity grade 3 or higher)**

| System Organ Class<br>Preferred Term                                       |         | Number (%) of Participants        |                        |
|----------------------------------------------------------------------------|---------|-----------------------------------|------------------------|
|                                                                            |         | ChAdOx1<br>nCoV-19<br>(N = 12282) | Control<br>(N = 11962) |
| <b>Infections and infestations</b>                                         |         |                                   |                        |
| Acute sinusitis                                                            | Grade 4 | 0                                 | 1 (<0.1)               |
| Appendicitis                                                               | Grade 3 | 1 (<0.1)                          | 0                      |
|                                                                            | Grade 4 | 3 (<0.1)                          | 3 (<0.1)               |
| Arthritis bacterial                                                        | Grade 3 | 1 (<0.1)                          | 0                      |
| Biliary sepsis                                                             | Grade 3 | 1 (<0.1)                          | 0                      |
| COVID-19                                                                   | Grade 3 | 3 (<0.1)                          | 4 (<0.1)               |
|                                                                            | Grade 4 | 2 (<0.1)                          | 6 ( 0.1)               |
| COVID-19 pneumonia                                                         | Grade 4 | 0                                 | 1 (<0.1)               |
| Cellulitis                                                                 | Grade 3 | 1 (<0.1)                          | 1 (<0.1)               |
| Diverticulitis                                                             | Grade 3 | 2 (<0.1)                          | 0                      |
| Ear infection                                                              | Grade 3 | 0                                 | 1 (<0.1)               |
| Escherichia infection                                                      | Grade 3 | 1 (<0.1)                          | 0                      |
| Gastroenteritis                                                            | Grade 3 | 1 (<0.1)                          | 0                      |
| Genital herpes                                                             | Grade 3 | 0                                 | 1 (<0.1)               |
| Gingivitis                                                                 | Grade 3 | 1 (<0.1)                          | 0                      |
| Helicobacter infection                                                     | Grade 3 | 2 (<0.1)                          | 0                      |
| Herpes zoster                                                              | Grade 3 | 0                                 | 3 (<0.1)               |
| Labyrinthitis                                                              | Grade 4 | 1 (<0.1)                          | 0                      |
| Large intestine infection                                                  | Grade 4 | 1 (<0.1)                          | 0                      |
| Nasopharyngitis                                                            | Grade 3 | 3 (<0.1)                          | 4 (<0.1)               |
| Otitis externa                                                             | Grade 4 | 1 (<0.1)                          | 0                      |
| Pharyngitis                                                                | Grade 3 | 0                                 | 1 (<0.1)               |
| Pharyngitis bacterial                                                      | Grade 3 | 1 (<0.1)                          | 0                      |
| Pneumonia bacterial                                                        | Grade 4 | 1 (<0.1)                          | 0                      |
| Pyelonephritis                                                             | Grade 3 | 2 (<0.1)                          | 1 (<0.1)               |
| Rhinitis                                                                   | Grade 3 | 0                                 | 1 (<0.1)               |
| Sepsis                                                                     | Grade 4 | 0                                 | 1 (<0.1)               |
| Septic shock                                                               | Grade 4 | 0                                 | 1 (<0.1)               |
| Suspected COVID-19                                                         | Grade 3 | 1 (<0.1)                          | 0                      |
| Tonsillitis                                                                | Grade 3 | 0                                 | 3 (<0.1)               |
| Tooth infection                                                            | Grade 3 | 1 (<0.1)                          | 1 (<0.1)               |
| Upper respiratory tract infection                                          | Grade 3 | 3 (<0.1)                          | 1 (<0.1)               |
| Urinary tract infection                                                    | Grade 3 | 0                                 | 1 (<0.1)               |
| Viral pharyngitis                                                          | Grade 3 | 0                                 | 1 (<0.1)               |
| Viral rash                                                                 | Grade 3 | 1 (<0.1)                          | 0                      |
| Wound infection                                                            | Grade 3 | 1 (<0.1)                          | 0                      |
| <b>Neoplasms benign, malignant and unspecified (incl cysts and polyps)</b> |         |                                   |                        |
| Basal cell carcinoma                                                       | Grade 3 | 0                                 | 1 (<0.1)               |
| Benign soft tissue neoplasm                                                | Grade 4 | 1 (<0.1)                          | 0                      |

|                                             |         |           |           |
|---------------------------------------------|---------|-----------|-----------|
| Colorectal cancer metastatic                | Grade 4 | 0         | 1 (<0.1)  |
| Haematological malignancy                   | Grade 4 | 0         | 1 (<0.1)  |
| Metastases to liver                         | Grade 4 | 0         | 1 (<0.1)  |
| Metastases to lung                          | Grade 4 | 0         | 1 (<0.1)  |
| Ovarian adenoma                             | Grade 3 | 1 (<0.1)  | 0         |
| Papillary thyroid cancer                    | Grade 3 | 0         | 1 (<0.1)  |
| <b>Blood and lymphatic system disorders</b> |         |           |           |
|                                             | Grade 4 | 0         | 1 (<0.1)  |
| Anaemia                                     | Grade 3 | 0         | 1 (<0.1)  |
| Iron deficiency anaemia                     | Grade 3 | 0         | 2 (<0.1)  |
| Lymphadenopathy                             | Grade 3 | 2 (<0.1)  | 1 (<0.1)  |
|                                             | Grade 4 | 0         | 1 (<0.1)  |
| Neutropenia                                 | Grade 3 | 0         | 2 (<0.1)  |
| <b>Immune system disorders</b>              |         |           |           |
| Allergy to chemicals                        | Grade 3 | 0         | 1 (<0.1)  |
| Metabolism and nutrition disorders          | Grade 3 | 3 (<0.1)  | 1 (<0.1)  |
|                                             | Grade 4 | 0         | 1 (<0.1)  |
| Decreased appetite                          | Grade 3 | 1 (<0.1)  | 0         |
| Dehydration                                 | Grade 3 | 1 (<0.1)  | 1 (<0.1)  |
| Diabetic ketoacidosis                       | Grade 4 | 0         | 1 (<0.1)  |
| Hypokalaemia                                | Grade 3 | 1 (<0.1)  | 0         |
| <b>Psychiatric disorders</b>                |         |           |           |
| Anxiety                                     | Grade 3 | 2 (<0.1)  | 0         |
| Depression                                  | Grade 3 | 1 (<0.1)  | 0         |
| Depression suicidal                         | Grade 4 | 1 (<0.1)  | 0         |
| Psychotic disorder                          | Grade 3 | 0         | 1 (<0.1)  |
| <b>Nervous system disorders</b>             |         |           |           |
| Ageusia                                     | Grade 3 | 6 (<0.1)  | 5 (<0.1)  |
| Anosmia                                     | Grade 3 | 6 (<0.1)  | 5 (<0.1)  |
| Balance disorder                            | Grade 4 | 0         | 1 (<0.1)  |
| Dizziness                                   | Grade 3 | 4 (<0.1)  | 2 (<0.1)  |
|                                             | Grade 4 | 0         | 1 (<0.1)  |
| Dysaesthesia                                | Grade 3 | 2 (<0.1)  | 0         |
| Dysarthria                                  | Grade 4 | 0         | 1 (<0.1)  |
| Facial paralysis                            | Grade 3 | 2 (<0.1)  | 0         |
| Facial spasm                                | Grade 3 | 1 (<0.1)  | 0         |
| Headache                                    | Grade 3 | 31 ( 0.3) | 26 ( 0.2) |
|                                             | Grade 4 | 0         | 3 (<0.1)  |
| Hypersomnia                                 | Grade 3 | 1 (<0.1)  | 0         |
| Migraine                                    | Grade 3 | 1 (<0.1)  | 6 ( 0.1)  |
|                                             | Grade 4 | 1 (<0.1)  | 0         |
| Multiple sclerosis                          | Grade 3 | 1 (<0.1)  | 0         |
| Myelitis transverse                         | Grade 3 | 1 (<0.1)  | 0         |
| Nystagmus                                   | Grade 3 | 1 (<0.1)  | 0         |
| Paraesthesia                                | Grade 3 | 1 (<0.1)  | 0         |
| Parosmia                                    | Grade 3 | 0         | 1 (<0.1)  |

|                                                        |         |          |          |
|--------------------------------------------------------|---------|----------|----------|
| Post herpetic neuralgia                                | Grade 3 | 1 (<0.1) | 0        |
| Presyncope                                             | Grade 3 | 1 (<0.1) | 1 (<0.1) |
| Sensory loss                                           | Grade 3 | 0        | 1 (<0.1) |
| Serotonin syndrome                                     | Grade 4 | 1 (<0.1) | 0        |
| Syncope                                                | Grade 3 | 0        | 1 (<0.1) |
| Taste disorder                                         | Grade 3 | 0        | 1 (<0.1) |
| Tonic convulsion                                       | Grade 3 | 1 (<0.1) | 0        |
| Visual field defect                                    | Grade 3 | 1 (<0.1) | 0        |
| <b>Eye disorders</b>                                   |         |          |          |
| Blindness                                              | Grade 3 | 1 (<0.1) | 0        |
| Blindness unilateral                                   | Grade 4 | 1 (<0.1) | 0        |
| Conjunctivitis allergic                                | Grade 3 | 0        | 1 (<0.1) |
| Eye pain                                               | Grade 3 | 1 (<0.1) | 0        |
| Ocular hyperaemia                                      | Grade 3 | 0        | 2 (<0.1) |
| Periorbital oedema                                     | Grade 3 | 0        | 1 (<0.1) |
| Photophobia                                            | Grade 3 | 2 (<0.1) | 0        |
| Retinal detachment                                     | Grade 3 | 1 (<0.1) | 1 (<0.1) |
| Vision blurred                                         | Grade 3 | 0        | 1 (<0.1) |
| Vitreous detachment                                    | Grade 3 | 1 (<0.1) | 0        |
| Vitreous floaters                                      | Grade 3 | 1 (<0.1) | 0        |
| <b>Ear and labyrinth disorders</b>                     |         |          |          |
| Auricular chondritis                                   | Grade 4 | 1 (<0.1) | 0        |
| Ear pain                                               | Grade 3 | 0        | 1 (<0.1) |
| Tinnitus                                               | Grade 3 | 0        | 1 (<0.1) |
| Vertigo                                                | Grade 3 | 2 (<0.1) | 1 (<0.1) |
| <b>Cardiac disorders</b>                               |         |          |          |
| Angina pectoris                                        | Grade 3 | 1 (<0.1) | 1 (<0.1) |
|                                                        | Grade 4 | 1 (<0.1) | 0        |
| Angina unstable                                        | Grade 4 | 1 (<0.1) | 0        |
| Atrioventricular block complete                        | Grade 3 | 1 (<0.1) | 0        |
| Bradycardia                                            | Grade 4 | 0        | 1 (<0.1) |
| Cardiac failure congestive                             | Grade 4 | 0        | 1 (<0.1) |
| Coronary artery occlusion                              | Grade 3 | 0        | 1 (<0.1) |
|                                                        | Grade 4 | 1 (<0.1) | 0        |
| Myocardial infarction                                  | Grade 3 | 0        | 1 (<0.1) |
| Palpitations                                           | Grade 3 | 0        | 3 (<0.1) |
| Pericarditis                                           | Grade 3 | 0        | 1 (<0.1) |
| Supraventricular tachycardia                           | Grade 3 | 0        | 1 (<0.1) |
| Tachycardia                                            | Grade 3 | 2 (<0.1) | 1 (<0.1) |
| Ventricular extrasystoles                              | Grade 3 | 0        | 1 (<0.1) |
| <b>Vascular disorders</b>                              |         |          |          |
| Hypertension                                           | Grade 3 | 2 (<0.1) | 1 (<0.1) |
| Hypotension                                            | Grade 3 | 0        | 1 (<0.1) |
| Orthostatic hypotension                                | Grade 3 | 1 (<0.1) | 0        |
| <b>Respiratory, thoracic and mediastinal disorders</b> |         |          |          |
| Asthma                                                 | Grade 3 | 1 (<0.1) | 1 (<0.1) |

|                                   |         |           |          |
|-----------------------------------|---------|-----------|----------|
| Cough                             | Grade 3 | 0         | 5 (<0.1) |
| Dyspnoea                          | Grade 3 | 3 (<0.1)  | 3 (<0.1) |
| Dyspnoea exertional               | Grade 4 | 1 (<0.1)  | 0        |
| Lung opacity                      | Grade 3 | 0         | 1 (<0.1) |
| Nasal turbinate hypertrophy       | Grade 4 | 0         | 1 (<0.1) |
| Oropharyngeal pain                | Grade 3 | 3 (<0.1)  | 4 (<0.1) |
| Rhinorrhoea                       | Grade 3 | 1 (<0.1)  | 2 (<0.1) |
| Sneezing                          | Grade 3 | 0         | 1 (<0.1) |
|                                   | Grade 4 | 1 (<0.1)  | 0        |
| <b>Gastrointestinal disorders</b> |         |           |          |
| Abdominal discomfort              | Grade 3 | 1 (<0.1)  | 0        |
| Abdominal pain                    | Grade 3 | 3 (<0.1)  | 3 (<0.1) |
|                                   | Grade 4 | 1 (<0.1)  | 0        |
| Abdominal pain lower              | Grade 3 | 2 (<0.1)  | 1 (<0.1) |
| Abdominal pain upper              | Grade 3 | 1 (<0.1)  | 0        |
|                                   | Grade 4 | 0         | 1 (<0.1) |
| Anal incontinence                 | Grade 3 | 0         | 1 (<0.1) |
| Colitis                           | Grade 3 | 1 (<0.1)  | 0        |
| Constipation                      | Grade 3 | 1 (<0.1)  | 1 (<0.1) |
| Crohn's disease                   | Grade 3 | 0         | 1 (<0.1) |
| Diarrhoea                         | Grade 3 | 2 (<0.1)  | 8 ( 0.1) |
|                                   | Grade 4 | 2 (<0.1)  | 0        |
| Discoloured vomit                 | Grade 3 | 1 (<0.1)  | 0        |
| Dyspepsia                         | Grade 3 | 0         | 1 (<0.1) |
| Gastric polyps                    | Grade 4 | 1 (<0.1)  | 0        |
| Gastritis                         | Grade 3 | 3 (<0.1)  | 0        |
| Gastrointestinal haemorrhage      | Grade 4 | 1 (<0.1)  | 0        |
| Gastrointestinal inflammation     | Grade 4 | 0         | 1 (<0.1) |
| Gastrooesophageal reflux disease  | Grade 3 | 1 (<0.1)  | 0        |
| Haematemesis                      | Grade 3 | 0         | 1 (<0.1) |
| Hiatus hernia                     | Grade 4 | 1 (<0.1)  | 0        |
| Incarcerated inguinal hernia      | Grade 4 | 1 (<0.1)  | 0        |
| Lip oedema                        | Grade 3 | 0         | 1 (<0.1) |
| Lip swelling                      | Grade 3 | 1 (<0.1)  | 0        |
| Melaena                           | Grade 4 | 1 (<0.1)  | 0        |
| Nausea                            | Grade 3 | 11 ( 0.1) | 3 (<0.1) |
|                                   | Grade 4 | 1 (<0.1)  | 2 (<0.1) |
| Odynophagia                       | Grade 3 | 1 (<0.1)  | 0        |
| Oesophageal spasm                 | Grade 4 | 1 (<0.1)  | 0        |
| Oral discomfort                   | Grade 3 | 1 (<0.1)  | 0        |
| Pancreatitis                      | Grade 4 | 1 (<0.1)  | 1 (<0.1) |
| Proctalgia                        | Grade 3 | 0         | 1 (<0.1) |
| Retching                          | Grade 3 | 1 (<0.1)  | 0        |
| Toothache                         | Grade 3 | 0         | 2 (<0.1) |
| Volvulus                          | Grade 3 | 1 (<0.1)  | 0        |
|                                   | Grade 4 | 1 (<0.1)  | 0        |

|                                                        |         |           |           |
|--------------------------------------------------------|---------|-----------|-----------|
| Vomiting                                               | Grade 3 | 6 (<0.1)  | 3 (<0.1)  |
|                                                        | Grade 4 | 1 (<0.1)  | 0         |
| <b>Hepatobiliary disorders</b>                         |         |           |           |
| Cholecystitis                                          | Grade 4 | 1 (<0.1)  | 0         |
| Cholelithiasis                                         | Grade 3 | 2 (<0.1)  | 0         |
|                                                        | Grade 4 | 0         | 1 (<0.1)  |
| <b>Skin and subcutaneous tissue disorders</b>          |         |           |           |
| Angioedema                                             | Grade 3 | 0         | 1 (<0.1)  |
|                                                        | Grade 4 | 0         | 1 (<0.1)  |
| Erythema                                               | Grade 3 | 1 (<0.1)  | 1 (<0.1)  |
| Hyperhidrosis                                          | Grade 3 | 1 (<0.1)  | 1 (<0.1)  |
| Night sweats                                           | Grade 3 | 0         | 1 (<0.1)  |
| Pruritus                                               | Grade 3 | 1 (<0.1)  | 1 (<0.1)  |
| Rash                                                   | Grade 3 | 0         | 1 (<0.1)  |
| Rash papular                                           | Grade 3 | 1 (<0.1)  | 0         |
| Skin burning sensation                                 | Grade 3 | 0         | 1 (<0.1)  |
| Skin ulcer                                             | Grade 3 | 1 (<0.1)  | 0         |
| Urticaria                                              | Grade 3 | 1 (<0.1)  | 0         |
| <b>Musculoskeletal and connective tissue disorders</b> |         |           |           |
| Arthralgia                                             | Grade 3 | 6 (<0.1)  | 6 ( 0.1)  |
|                                                        | Grade 4 | 1 (<0.1)  | 0         |
| Arthropathy                                            | Grade 3 | 0         | 1 (<0.1)  |
| Back pain                                              | Grade 3 | 6 (<0.1)  | 6 ( 0.1)  |
|                                                        | Grade 4 | 0         | 2 (<0.1)  |
| Costochondritis                                        | Grade 3 | 1 (<0.1)  | 0         |
| Intervertebral disc protrusion                         | Grade 3 | 4 (<0.1)  | 1 (<0.1)  |
|                                                        | Grade 4 | 1 (<0.1)  | 0         |
| Joint range of motion decreased                        | Grade 3 | 0         | 1 (<0.1)  |
| Muscle spasms                                          | Grade 3 | 0         | 1 (<0.1)  |
| Musculoskeletal chest pain                             | Grade 3 | 1 (<0.1)  | 0         |
| Myalgia                                                | Grade 3 | 27 ( 0.2) | 12 ( 0.1) |
|                                                        | Grade 4 | 4 (<0.1)  | 1 (<0.1)  |
| Neck pain                                              | Grade 3 | 3 (<0.1)  | 0         |
| Osteoarthritis                                         | Grade 4 | 1 (<0.1)  | 0         |
| Pain in extremity                                      | Grade 3 | 4 (<0.1)  | 1 (<0.1)  |
| Pain in jaw                                            | Grade 3 | 0         | 1 (<0.1)  |
| Periarthritis                                          | Grade 3 | 0         | 1 (<0.1)  |
| Rotator cuff syndrome                                  | Grade 3 | 1 (<0.1)  | 0         |
| Somatic dysfunction                                    | Grade 3 | 1 (<0.1)  | 0         |
| Spinal osteoarthritis                                  | Grade 3 | 1 (<0.1)  | 0         |
| Spinal pain                                            | Grade 3 | 1 (<0.1)  | 0         |
|                                                        | Grade 4 | 1 (<0.1)  | 0         |
| Spinal synovial cyst                                   | Grade 4 | 1 (<0.1)  | 0         |
| Spondylolysis                                          | Grade 3 | 1 (<0.1)  | 0         |
| <b>Renal and urinary disorders</b>                     |         |           |           |
| Calculus urethral                                      | Grade 4 | 0         | 1 (<0.1)  |



|                                                             |         |           |          |
|-------------------------------------------------------------|---------|-----------|----------|
| Dysuria                                                     | Grade 3 | 2 (<0.1)  | 1 (<0.1) |
| Micturition disorder                                        | Grade 3 | 1 (<0.1)  | 0        |
| Nephrolithiasis                                             | Grade 3 | 1 (<0.1)  | 2 (<0.1) |
|                                                             | Grade 4 | 0         | 1 (<0.1) |
| Renal colic                                                 | Grade 3 | 1 (<0.1)  | 1 (<0.1) |
|                                                             | Grade 4 | 0         | 2 (<0.1) |
| Ureterolithiasis                                            | Grade 4 | 0         | 1 (<0.1) |
| Urge incontinence                                           | Grade 3 | 0         | 1 (<0.1) |
| <b>Reproductive system and breast disorders</b>             |         |           |          |
| Adnexal torsion                                             | Grade 4 | 1 (<0.1)  | 0        |
| Breast mass                                                 | Grade 3 | 1 (<0.1)  | 0        |
| Breast pain                                                 | Grade 3 | 1 (<0.1)  | 0        |
| Cervical dysplasia                                          | Grade 3 | 0         | 1 (<0.1) |
| Endometriosis                                               | Grade 4 | 1 (<0.1)  | 0        |
| Haemorrhagic ovarian cyst                                   | Grade 4 | 1 (<0.1)  | 0        |
| Menorrhagia                                                 | Grade 3 | 0         | 1 (<0.1) |
| Ovarian cyst                                                | Grade 4 | 1 (<0.1)  | 0        |
| Ovarian cyst ruptured                                       | Grade 3 | 0         | 1 (<0.1) |
|                                                             | Grade 4 | 1 (<0.1)  | 0        |
| Pelvic haemorrhage                                          | Grade 3 | 1 (<0.1)  | 0        |
| Testicular pain                                             | Grade 3 | 1 (<0.1)  | 0        |
| Uterine haemorrhage                                         | Grade 4 | 1 (<0.1)  | 0        |
| Vaginal haemorrhage                                         | Grade 4 | 1 (<0.1)  | 0        |
| Vulvovaginal dryness                                        | Grade 3 | 0         | 1 (<0.1) |
| <b>Congenital, familial and genetic disorders</b>           |         |           |          |
| Accessory spleen                                            | Grade 3 | 1 (<0.1)  | 0        |
| Phimosi                                                     | Grade 3 | 0         | 1 (<0.1) |
| <b>General disorders and administration site conditions</b> |         |           |          |
| Asthenia                                                    | Grade 3 | 5 (<0.1)  | 3 (<0.1) |
|                                                             | Grade 4 | 1 (<0.1)  | 0        |
| Chest discomfort                                            | Grade 3 | 0         | 1 (<0.1) |
| Chest pain                                                  | Grade 3 | 3 (<0.1)  | 2 (<0.1) |
|                                                             | Grade 4 | 2 (<0.1)  | 1 (<0.1) |
| Chills                                                      | Grade 3 | 12 ( 0.1) | 1 (<0.1) |
|                                                             | Grade 4 | 1 (<0.1)  | 1 (<0.1) |
| Fatigue                                                     | Grade 3 | 18 ( 0.1) | 4 (<0.1) |
|                                                             | Grade 4 | 0         | 2 (<0.1) |
| Feeling hot                                                 | Grade 3 | 1 (<0.1)  | 0        |
| Illness                                                     | Grade 3 | 0         | 1 (<0.1) |
|                                                             | Grade 4 | 0         | 1 (<0.1) |
| Influenza like illness                                      | Grade 3 | 1 (<0.1)  | 0        |
| Malaise                                                     | Grade 3 | 7 ( 0.1)  | 2 (<0.1) |
|                                                             | Grade 4 | 1 (<0.1)  | 2 (<0.1) |
| Oedema peripheral                                           | Grade 3 | 1 (<0.1)  | 0        |
| Pain                                                        | Grade 3 | 5 (<0.1)  | 2 (<0.1) |
| Pyrexia                                                     | Grade 3 | 37 ( 0.3) | 7 ( 0.1) |

|                                                       |         |           |           |
|-------------------------------------------------------|---------|-----------|-----------|
|                                                       | Grade 4 | 2 (<0.1)  | 0         |
| Shoulder injury related to vaccine administration     | Grade 3 | 0         | 1 (<0.1)  |
| Stenosis                                              | Grade 4 | 0         | 1 (<0.1)  |
| Swelling                                              | Grade 3 | 1 (<0.1)  | 0         |
| Swelling face                                         | Grade 3 | 1 (<0.1)  | 1 (<0.1)  |
| Systemic inflammatory response syndrome               | Grade 4 | 1 (<0.1)  | 0         |
| Ulcer                                                 | Grade 3 | 0         | 1 (<0.1)  |
| Vaccination site bruising                             | Grade 3 | 1 (<0.1)  | 0         |
| Vaccination site erythema                             | Grade 3 | 3 (<0.1)  | 8 ( 0.1)  |
|                                                       | Grade 4 | 1 (<0.1)  | 0         |
| Vaccination site hypoaesthesia                        | Grade 3 | 0         | 1 (<0.1)  |
| Vaccination site induration                           | Grade 3 | 1 (<0.1)  | 0         |
|                                                       | Grade 4 | 1 (<0.1)  | 0         |
| Vaccination site oedema                               | Grade 3 | 0         | 4 (<0.1)  |
|                                                       | Grade 4 | 1 (<0.1)  | 0         |
| Vaccination site pain                                 | Grade 3 | 15 ( 0.1) | 12 ( 0.1) |
|                                                       | Grade 4 | 6 (<0.1)  | 2 (<0.1)  |
| Vaccination site pruritus                             | Grade 3 | 0         | 1 (<0.1)  |
| Vaccination site rash                                 | Grade 3 | 0         | 1 (<0.1)  |
| Vaccination site reaction                             | Grade 3 | 1 (<0.1)  | 0         |
| Vaccination site swelling                             | Grade 3 | 0         | 2 (<0.1)  |
| <b>Investigations</b>                                 |         |           |           |
| Amylase increased                                     | Grade 3 | 1 (<0.1)  | 0         |
| Blood potassium abnormal                              | Grade 3 | 2 (<0.1)  | 0         |
| Blood potassium decreased                             | Grade 3 | 2 (<0.1)  | 0         |
| Blood pressure increased                              | Grade 3 | 1 (<0.1)  | 0         |
| Blood urine present                                   | Grade 3 | 1 (<0.1)  | 0         |
| Body temperature abnormal                             | Grade 3 | 0         | 1 (<0.1)  |
| Body temperature increased                            | Grade 3 | 2 (<0.1)  | 1 (<0.1)  |
| C-reactive protein abnormal                           | Grade 3 | 1 (<0.1)  | 0         |
| C-reactive protein increased                          | Grade 3 | 2 (<0.1)  | 1 (<0.1)  |
|                                                       | Grade 4 | 1 (<0.1)  | 0         |
| Electrocardiogram P wave abnormal                     | Grade 3 | 1 (<0.1)  | 0         |
| Electrocardiogram normal                              | Grade 3 | 1 (<0.1)  | 0         |
| Lipase abnormal                                       | Grade 3 | 1 (<0.1)  | 0         |
| Liver function test abnormal                          | Grade 4 | 1 (<0.1)  | 0         |
| Lymphocyte count decreased                            | Grade 3 | 1 (<0.1)  | 0         |
| Oxygen saturation decreased                           | Grade 3 | 0         | 1 (<0.1)  |
|                                                       | Grade 4 | 1 (<0.1)  | 0         |
| <b>Injury, poisoning and procedural complications</b> |         |           |           |
| Ankle fracture                                        | Grade 3 | 0         | 1 (<0.1)  |
| Back injury                                           | Grade 3 | 1 (<0.1)  | 0         |
| Contusion                                             | Grade 3 | 1 (<0.1)  | 0         |
| Craniocerebral injury                                 | Grade 4 | 1 (<0.1)  | 1 (<0.1)  |
| Eye injury                                            | Grade 3 | 0         | 1 (<0.1)  |
| Fall                                                  | Grade 3 | 0         | 4 (<0.1)  |

|                             |         |          |          |
|-----------------------------|---------|----------|----------|
|                             | Grade 4 | 2 (<0.1) | 0        |
| Foot fracture               | Grade 3 | 0        | 3 (<0.1) |
| Hand fracture               | Grade 3 | 1 (<0.1) | 1 (<0.1) |
| Injury                      | Grade 3 | 1 (<0.1) | 1 (<0.1) |
|                             | Grade 5 | 0        | 1 (<0.1) |
| Injury corneal              | Grade 3 | 0        | 1 (<0.1) |
| Joint dislocation           | Grade 3 | 3 (<0.1) | 0        |
| Joint injury                | Grade 3 | 1 (<0.1) | 0        |
| Ligament sprain             | Grade 4 | 0        | 1 (<0.1) |
| Limb injury                 | Grade 3 | 0        | 1 (<0.1) |
| Lower limb fracture         | Grade 3 | 0        | 1 (<0.1) |
| Meniscus injury             | Grade 4 | 1 (<0.1) | 0        |
| Muscle strain               | Grade 3 | 1 (<0.1) | 0        |
| Post procedural hypotension | Grade 3 | 0        | 1 (<0.1) |
| Radius fracture             | Grade 3 | 0        | 1 (<0.1) |
|                             | Grade 4 | 0        | 1 (<0.1) |
| Repetitive strain injury    | Grade 3 | 1 (<0.1) | 0        |
| Road traffic accident       | Grade 3 | 1 (<0.1) | 1 (<0.1) |
| Skin laceration             | Grade 4 | 1 (<0.1) | 0        |
| Tendon injury               | Grade 4 | 1 (<0.1) | 0        |
| Tendon rupture              | Grade 4 | 1 (<0.1) | 0        |
| Thermal burn                | Grade 3 | 0        | 1 (<0.1) |
| Upper limb fracture         | Grade 3 | 0        | 2 (<0.1) |
| Wrist fracture              | Grade 3 | 1 (<0.1) | 0        |
| <b>Social circumstances</b> |         |          |          |
| Homicide                    | Grade 5 | 0        | 1 (<0.1) |

## Oxford Trial Group

|                        |                                                                                                                                                                           |
|------------------------|---------------------------------------------------------------------------------------------------------------------------------------------------------------------------|
| Marites Aban           | NIHR Imperial Clinical Research Facility, London, UK                                                                                                                      |
| Kushala W M Abeysekera | University Hospitals Bristol & Weston NHS Foundation Trust                                                                                                                |
| Jeremy Aboagye         | Jenner Institute, Nuffield Department of Medicine, University of Oxford, UK                                                                                               |
| Matthew Adam           | Clinical Infection Research Group, Regional Infectious Diseases Unit, NHS Lothian, UK                                                                                     |
| Kirsty Adams           | NIHR UCLH Clinical Research Facility, London, UK                                                                                                                          |
| James P. Adamson       | Public Health Wales NHS Trust, Cardiff, UK                                                                                                                                |
| Gbadebo Adewetan       | London Northwest University Healthcare, Northwick Park Hospital, London, UK                                                                                               |
| Syed Adlou             | Oxford Vaccine Group, Department of Paediatrics, University of Oxford, UK                                                                                                 |
| Khatija Ahmed          | Setshababa Research Centre, Tshwane, South Africa                                                                                                                         |
| Yasmeen Akhalwaya      | Family Centre for Research with Ubuntu, Department of Paediatrics, University of Stellenbosch, Cape Town, South Africa                                                    |
| Saajida Akhalwaya      | Wits Reproductive Health and HIV Institute, Faculty of Health Sciences, University of the Witwatersrand, Johannesburg, South Africa                                       |
| Andrew Alcock          | Oxford Biomedica PLC, Transport Way, Cowley, Oxford                                                                                                                       |
| Aabidah Ali            | Jenner Institute, Nuffield Department of Medicine, University of Oxford, UK                                                                                               |
| Elizabeth R. Allen     | Jenner Institute, Nuffield Department of Medicine, University of Oxford, UK                                                                                               |
| Lauren Allen           | National Infection Service, Public Health England, UK                                                                                                                     |
| Felipe B. Alvernaz     | Universidade Federal de São Paulo, Brazil                                                                                                                                 |
| Fábio Santos Amorim    | Instituto D'Or de Pesquisa e Ensino (IDOR), Salvador, Brazil and Hospital São Rafael and Hospital Couto Maia, Salvador, Brazil                                            |
| Cláudia Sala Andrade   | Hospital Universitário de Santa Maria, Santa Maria, Brazil                                                                                                                |
| Foteini Andritsou      | Department of Paediatrics, University of Oxford, UK                                                                                                                       |
| Rachel Anslow          | Oxford Vaccine Group, Department of Paediatrics, University of Oxford, UK                                                                                                 |
| Edward H. Arbe-Barnes  | University of Oxford Medical School, Medical Sciences Division, University of Oxford, UK                                                                                  |
| Markus P. Ariaans      | Department of Infection, Immunity and Cardiovascular Disease, University of Sheffield, UK                                                                                 |
| Beatriz Arns           | Hospital de Clinicas de Porto Alegre, Universidade Federal do Rio Grande do Sul, Brazil                                                                                   |
| Laiana Arruda          | Instituto D'Or de Pesquisa e Ensino (IDOR), Salvador, Brazil and Hospital São Rafael, Salvador, Brazil                                                                    |
| Luiza Assad            | Instituto D'Or de Pesquisa e Ensino (IDOR), Rio de Janeiro, Brazil and Hospital Quinta D'OR, Rede D'Or São Luiz, Rio de Janeiro, Brazil                                   |
| Paula De Almeida Azi   | Instituto D'Or de Pesquisa e Ensino (IDOR), Salvador, Brazil and Hospital São Rafael, Salvador, Brazil / Hospital Aliança/ Rede D'OR, Brazil                              |
| Lorena De Almeida Azi  | Instituto D'Or de Pesquisa e Ensino (IDOR), Salvador, Brazil and Hospital São Rafael, Salvador, Brazil / Hospital das Clínicas (Unidade de atenção psicossocial do HUPES) |

|                            |                                                                                                                                                                                                            |
|----------------------------|------------------------------------------------------------------------------------------------------------------------------------------------------------------------------------------------------------|
| Gavin Babbage              | NIHR Southampton Clinical Research Facility, Southampton, UK                                                                                                                                               |
| Catherine Bailey           | Aneurin Bevan University Health Board, Newport, Wales, UK                                                                                                                                                  |
| Kenneth F. Baker           | Department of Infection and Tropical Medicine, Newcastle upon Tyne Hospitals NHS Foundation Trust and Translational and Clinical Research Institute, Immunity and Inflammation Theme, Newcastle University |
| Megan Baker                | Jenner Institute, Nuffield Department of Medicine, University of Oxford, UK                                                                                                                                |
| Natalie Baker              | National Infection Service, Public Health England, UK                                                                                                                                                      |
| Philip Baker               | University of Oxford Medical School, Medical Sciences Division, University of Oxford, UK                                                                                                                   |
| Ioana Baleanu              | Clinical BioManufacturing Facility, Jenner Institute, University of Oxford, UK                                                                                                                             |
| Danieli Bandeira           | Postgraduate Programme in Nursing, Universidade Federal de Santa Maria, Santa Maria, Brazil                                                                                                                |
| Anna Bara                  | NIHR Imperial Clinical Research Facility, London, UK                                                                                                                                                       |
| Marcella A. S. Barbosa     | Centro de Estudos e Pesquisas em Moléstias Infecciosas, Rio Grande do Norte, Brazil                                                                                                                        |
| Deborah Barker             | Oxford University Hospitals NHS Trust, Oxford, UK                                                                                                                                                          |
| Gavin D Barlow             | Experimental Medicine & Biomedicine, Hull York Medical School, UK                                                                                                                                          |
| Eleanor Barnes             | Nuffield Department of Medicine, University of Oxford, UK                                                                                                                                                  |
| Andrew S. Barr             | Department of Infection and Tropical Medicine, Newcastle upon Tyne Hospitals NHS Foundation Trust, UK                                                                                                      |
| Jordan R. Barrett          | Jenner Institute, Nuffield Department of Medicine, University of Oxford, UK                                                                                                                                |
| Jessica Barrett            | London Northwest University Healthcare, Northwick Park Hospital, London, UK                                                                                                                                |
| Kelly Barrett              | Nuffield Department of Women's and Reproductive Health, University of Oxford, UK                                                                                                                           |
| Louise Bates               | Oxford Vaccine Group, Department of Paediatrics, University of Oxford, UK                                                                                                                                  |
| Alexander Batten           | Clinical BioManufacturing Facility, Jenner Institute, University of Oxford, UK                                                                                                                             |
| Kirsten Beadon             | Oxford Vaccine Group, Department of Paediatrics, University of Oxford, UK                                                                                                                                  |
| Emily Beales               | Vaccine Institute, Institute of Infection & Immunity, St. Georges, University of London and St Georges University Hospitals NHS Trust, London, UK                                                          |
| Rebecca Beckley            | Oxford Vaccine Group, Department of Paediatrics, University of Oxford, UK                                                                                                                                  |
| Sandra Belij-Rammerstorfer | Jenner Institute, Nuffield Department of Medicine, University of Oxford, UK                                                                                                                                |
| Jonathan Bell              | Oxford Vaccine Group, Department of Paediatrics, University of Oxford, UK                                                                                                                                  |
| Duncan Bellamy             | Jenner Institute, Nuffield Department of Medicine, University of Oxford, UK                                                                                                                                |
| Sue Belton                 | The University of Nottingham Health Service, Cripps Health Centre, University Park, Nottingham, UK                                                                                                         |

|                      |                                                                                                                                                   |
|----------------------|---------------------------------------------------------------------------------------------------------------------------------------------------|
| Adam Berg            | Jenner Institute, Nuffield Department of Medicine, University of Oxford, UK                                                                       |
| Laura Bermejo        | Nuffield Department of Clinical Medicine, University of Oxford, UK                                                                                |
| Eleanor Berrie       | Clinical BioManufacturing Facility, Jenner Institute, University of Oxford, UK                                                                    |
| Lisa Berry           | NIHR Southampton Clinical Research Facility, Southampton, UK                                                                                      |
| Daniella Berzsenyi   | Oxford Vaccine Group, Department of Paediatrics, University of Oxford, UK                                                                         |
| Amy Beveridge        | Oxford Vaccine Group, Department of Paediatrics, University of Oxford, UK                                                                         |
| Kevin R Bewley       | National Infection Service, Public Health England, UK                                                                                             |
| Inderjeet Bharaj     | London Northwest University Healthcare, Northwick Park Hospital, London, UK                                                                       |
| Sutika Bhikha        | VIDA - Vaccines and Infectious Diseases Analytical Research Unit, Diepkloof, Soweto, South Africa                                                 |
| Asad E. Bhorat       | Soweto Clinical Trials Centre, Johannesburg, South Africa                                                                                         |
| Zahedah E. Bhorat    | Soweto Clinical Trials Centre, Johannesburg, South Africa                                                                                         |
| Else Margreet Bijker | Oxford Vaccine Group, Department of Paediatrics, University of Oxford, UK                                                                         |
| Sarah Birch          | Academic Directorate of Communicable Diseases and Specialised Medicine, Sheffield Teaching Hospitals NHS Foundation Trust                         |
| Gurpreet Birch       | Cobra Biologics, Keele Science Park, UK                                                                                                           |
| Kathryn Birchall     | Clinical Research Facility, Sheffield Teaching Hospitals NHS Foundation Trust, UK                                                                 |
| Adam Bird            | Oxford Biomedica PLC, Transport Way, Cowley, Oxford                                                                                               |
| Olivia Bird          | Vaccine Institute, Institute of Infection & Immunity, St. Georges, University of London and St Georges University Hospitals NHS Trust, London, UK |
| Karen Bisnauthsing   | NIHR BRC at Guy's and St Thomas' NHS Foundation Trust, UK                                                                                         |
| Mustapha Bittaye     | Jenner Institute, Nuffield Department of Medicine, University of Oxford, UK                                                                       |
| Luke Blackwell       | Oxford Vaccine Group, Department of Paediatrics, University of Oxford, UK                                                                         |
| Rachel Blacow        | Clinical Research Facility, Queen Elizabeth University Hospital, Glasgow, UK                                                                      |
| Heather Bletchly     | Oxford Vaccine Group, Department of Paediatrics, University of Oxford, UK                                                                         |
| Caitlin L Blundell   | Department of Biochemistry, University of Oxford, UK                                                                                              |
| Susannah R Blundell  | Department of Biochemistry, University of Oxford, UK                                                                                              |
| Pritesh Bodalia      | Pharmacy, University College London Hospitals NHS Trust, UK                                                                                       |
| Emma Bolam           | Clinical BioManufacturing Facility, Jenner Institute, University of Oxford, UK                                                                    |
| Elena Boland         | Clinical BioManufacturing Facility, Jenner Institute, University of Oxford, UK                                                                    |
| Daan Bormans         | Halix B.V., Tinbergenweg 1, 2333 BB Leiden, Netherlands                                                                                           |
| Nicola Borthwick     | Jenner Institute, Nuffield Department of Medicine, University of Oxford, UK                                                                       |
| Francesca Bowring    | Oxford University Hospitals NHS Foundation Trust, Oxford, UK                                                                                      |

|                          |                                                                                                                                                   |
|--------------------------|---------------------------------------------------------------------------------------------------------------------------------------------------|
| Amy Boyd                 | Jenner Institute, Nuffield Department of Medicine, University of Oxford, UK                                                                       |
| Penny Bradley            | Department of Pharmacy, Newcastle upon Tyne Hospitals NHS Foundation Trust, UK                                                                    |
| Tanja Brenner            | Clinical BioManufacturing Facility, Jenner Institute, University of Oxford, UK                                                                    |
| Alice Bridges-Webb       | Oxford Vaccine Group, Department of Paediatrics, University of Oxford, UK                                                                         |
| Phillip Brown            | National Infection Service, Public Health England, UK                                                                                             |
| Claire Brown             | NIHR/Wellcome Trust Birmingham Clinical Research Facility, Birmingham, UK                                                                         |
| Charlie Brown-O'Sullivan | Jenner Institute, Nuffield Department of Medicine, University of Oxford, UK                                                                       |
| Scott Bruce              | Cobra Biologics, Keele Science Park, UK                                                                                                           |
| Emily Brunt              | National Infection Service, Public Health England, UK                                                                                             |
| William Budd             | NIHR Imperial Clinical Research Facility, London, UK                                                                                              |
| Yusuf A. Bulbulia        | Soweto Clinical Trials Centre, Johannesburg, South Africa                                                                                         |
| Melanie Bull             | Oxford Biomedica PLC, Transport Way, Cowley, Oxford                                                                                               |
| Jamie Burbage            | Oxford Vaccine Group, Department of Paediatrics, University of Oxford, UK                                                                         |
| Aileen Burn              | Research Directorate, Newcastle upon Tyne Hospitals NHS Foundation Trust, UK                                                                      |
| Karen R Buttigieg        | National Infection Service, Public Health England, UK                                                                                             |
| Nicholas Byard           | Jenner Institute, Nuffield Department of Medicine, University of Oxford, UK                                                                       |
| Ingrid Cabrera Puig      | Jenner Institute, Nuffield Department of Medicine, University of Oxford, UK                                                                       |
| Anna Calvert             | Vaccine Institute, Institute of Infection & Immunity, St. Georges, University of London and St Georges University Hospitals NHS Trust, London, UK |
| Susana Camara            | Oxford Vaccine Group, Department of Paediatrics, University of Oxford, UK                                                                         |
| Michelangelo Cao         | Nuffield Department of Clinical Neurosciences, University of Oxford, UK                                                                           |
| Federica Cappuccini      | Jenner Institute, Nuffield Department of Medicine, University of Oxford, UK                                                                       |
| Rita Cardona             | Universidade Federal de São Paulo, Brazil                                                                                                         |
| João R. Cardoso          | Instituto D'Or de Pesquisa e Ensino (IDOR), Rio de Janeiro, Brazil and Hospital Quinta D'OR, Rede D'Or São Luiz, Rio de Janeiro, Brazil           |
| Melanie Carr             | Oxford Vaccine Group, Department of Paediatrics, University of Oxford, UK                                                                         |
| Miles W Carroll          | National Infection Service, Public Health England, UK                                                                                             |
| Andrew Carson-Stevens    | Division of Population Medicine, School of Medicine, Cardiff University, UK                                                                       |
| Yasmin de M. Carvalho    | Centro de Estudos e Pesquisas em Moléstias Infecciosas, Rio Grande do Norte, Brazil                                                               |
| Helen R Casey            | North Bristol NHS Trust, Bristol, UK                                                                                                              |
| Paul Cashen              | Pall Europe Ltd, Harbourgate Business Park, Portsmouth, UK                                                                                        |

|                        |                                                                                                                                                   |
|------------------------|---------------------------------------------------------------------------------------------------------------------------------------------------|
| Thais R. Y Castro      | Postgraduate Programme in Pharmaceutical Sciences, Universidade Federal de Santa Maria, Santa Maria, Brazil                                       |
| Lucia Carratala Castro | Vaccine Institute, Institute of Infection & Immunity, St. Georges, University of London and St Georges University Hospitals NHS Trust, London, UK |
| Katrina Cathie         | University Hospital Southampton NHS Foundation Trust, UK                                                                                          |
| Ana Cavey              | Nuffield Department of Clinical Neurosciences, University of Oxford, UK                                                                           |
| José Cerbino-Neto      | Instituto D'Or de Pesquisa e Ensino (IDOR), Rio de Janeiro, Brazil                                                                                |
| Luiz Fernando F. Cezar | Instituto D'Or de Pesquisa e Ensino (IDOR), Rio de Janeiro, Brazil                                                                                |
| Jim Chadwick           | National Infection Service, Public Health England, UK                                                                                             |
| David Chapman          | Oxfordshire Clinical Commissioning Group, Oxford, UK                                                                                              |
| Sue Charlton           | National Infection Service, Public Health England, UK                                                                                             |
| Katerina S. Cheliotis  | Department of Clinical Sciences, Liverpool School of Tropical Medicine, Liverpool, UK                                                             |
| Irina Chelysheva       | Oxford Vaccine Group, Department of Paediatrics, University of Oxford, UK                                                                         |
| Oliver Chester         | Oxford Vaccine Group, Department of Paediatrics, University of Oxford, UK                                                                         |
| Sunder Chita           | London Northwest University Healthcare, Northwick Park Hospital, London, UK                                                                       |
| Emily Chiplin          | National Infection Service, Public Health England, UK                                                                                             |
| Jee-Sun Cho            | Jenner Institute, Nuffield Department of Medicine, University of Oxford, UK                                                                       |
| Liliana Cifuentes      | Kennedy Institute of Rheumatology, Nuffield Department of Orthopaedics, The University of Oxford, UK                                              |
| Elizabeth Clark        | Oxford Vaccine Group, Department of Paediatrics, University of Oxford, UK                                                                         |
| Matthew Clark          | Oxford Vaccine Group, Department of Paediatrics, University of Oxford, UK                                                                         |
| Rachel Colin-Jones     | Oxford Vaccine Group, Department of Paediatrics, University of Oxford, UK                                                                         |
| Sarah L. K. Collins    | Nuffield Department of Women's and Reproductive Health, University of Oxford, UK                                                                  |
| Hayley Colton          | Department of Infection and Tropical Medicine, Sheffield Teaching Hospitals NHS Foundation Trust                                                  |
| Christopher P. Conlon  | Nuffield Department of Medicine, University of Oxford, UK                                                                                         |
| Sean Connarty          | London Northwest University Healthcare, Northwick Park Hospital, London, UK                                                                       |
| Naomi S. Coombes       | National Infection Service, Public Health England, UK                                                                                             |
| Cushla Cooper          | Nuffield Dept of Orthopaedics Rheumatology and Musculoskeletal Medicine, University of Oxford, UK                                                 |
| Rachel Cooper          | Oxford Vaccine Group, Department of Paediatrics, University of Oxford, UK                                                                         |
| Lynne Cornelissen      | Family Centre for Research with Ubuntu, Department of Paediatrics, University of Stellenbosch, Cape Town, South Africa                            |
| Tumena Corrah          | London Northwest University Healthcare, Northwick Park Hospital, London, UK                                                                       |



|                                |                                                                                                                                                                                                                                           |
|--------------------------------|-------------------------------------------------------------------------------------------------------------------------------------------------------------------------------------------------------------------------------------------|
| Catherine A. Cosgrove          | Vaccine Institute, Institute of Infection & Immunity, St. Georges, University of London and St Georges University Hospitals NHS Trust, London, UK                                                                                         |
| Fernanda Barroso Costa         | Instituto D'Or de Pesquisa e Ensino (IDOR), Rio de Janeiro, Brazil and Hospital Quinta D'OR, Rede D'Or São Luiz, Rio de Janeiro, Brazil                                                                                                   |
| Tony Cox OBE                   | NIHR National Biosample Centre, Milton Keynes, UK                                                                                                                                                                                         |
| Wendy E. M. Crocker            | Jenner Institute, Nuffield Department of Medicine, University of Oxford, UK                                                                                                                                                               |
| Sarah Crosbie                  | Oxford University Hospitals NHS Foundation Trust, Oxford, UK                                                                                                                                                                              |
| Dan Cullen                     | Nuffield Department of Clinical Neurosciences, University of Oxford, UK                                                                                                                                                                   |
| Debora R. M. F. Cunha          | Hospital de Clinicas de Porto Alegre, Universidade Federal do Rio Grande do Sul, Brazil                                                                                                                                                   |
| Christina J Cunningham         | Oxford Vaccine Group, Department of Paediatrics, University of Oxford, UK                                                                                                                                                                 |
| Fiona C. Cuthbertson           | Nuffield Department of Clinical Neurosciences, University of Oxford, UK                                                                                                                                                                   |
| Daniel Marinho da Costa        | Instituto D'Or de Pesquisa e Ensino (IDOR), Rio de Janeiro, Brazil                                                                                                                                                                        |
| Suzete N. Farias Da Guarda     | Universidade Federal da Bahia / Instituto D'Or de Pesquisa e Ensino (IDOR), Salvador, Brazil and Hospital São Rafael, Salvador, Brazil                                                                                                    |
| Larissa P. da Silva            | Hospital de Clinicas de Porto Alegre, Universidade Federal do Rio Grande do Sul, Brazil                                                                                                                                                   |
| Antonio Carlos Da Silva Moraes | Instituto D'Or de Pesquisa e Ensino (IDOR), Rio de Janeiro, Brazil                                                                                                                                                                        |
| Brad E. Damratoski             | Clinical BioManufacturing Facility, Jenner Institute, University of Oxford, UK                                                                                                                                                            |
| Zsofia Danos                   | Vaccine Institute, Institute of Infection & Immunity, St. Georges, University of London and St Georges University Hospitals NHS Trust, London, UK                                                                                         |
| Maria T. D. C. Dantas          | Centro de Estudos e Pesquisas em Moléstias Infecciosas, Rio Grande do Norte, Brazil                                                                                                                                                       |
| Mehreen S Datto                | Jenner Institute, Nuffield Department of Medicine, University of Oxford, UK                                                                                                                                                               |
| Chandrabali Datta              | Clinical BioManufacturing Facility, Jenner Institute, University of Oxford, UK                                                                                                                                                            |
| Malika Davids                  | Centre for Lung Infection and Immunity, Division of Pulmonology, Department of Medicine and UCT Lung Institute & South African MRC/UCT Centre for the Study of Antimicrobial Resistance, University of Cape Town, Cape Town, South Africa |
| Sarah L Davies                 | Cobra Biologics, Keele Science Park, UK                                                                                                                                                                                                   |
| Kelly Davies                   | Department of Clinical Sciences, Liverpool School of Tropical Medicine, Liverpool, UK                                                                                                                                                     |
| Hannah Davies                  | Jenner Institute, Nuffield Department of Medicine, University of Oxford, UK                                                                                                                                                               |
| Sophie Davies                  | Jenner Institute, Nuffield Department of Medicine, University of Oxford, UK                                                                                                                                                               |
| Judith Davies                  | Oxford Vaccine Group, Department of Paediatrics, University of Oxford, UK                                                                                                                                                                 |
| Elizabeth J. Davis             | Oxford University Hospitals NHS Foundation Trust, Oxford, UK                                                                                                                                                                              |

|                                    |                                                                                                                        |
|------------------------------------|------------------------------------------------------------------------------------------------------------------------|
| John Davis                         | Research Directorate, Newcastle upon Tyne Hospitals NHS Foundation Trust, UK                                           |
| José A. M. de Carvalho             | Department of Clinical and Toxicological Analysis- Universidade Federal de Santa Maria, Santa Maria, Brazil            |
| Jeanne De Jager                    | Family Centre for Research with Ubuntu, Department of Paediatrics, University of Stellenbosch, Cape Town, South Africa |
| Sergio Carlos de A. de Jesus Jr.   | Instituto D'Or de Pesquisa e Ensino (IDOR), Rio de Janeiro, Brazil                                                     |
| Lis Moreno De Oliveira Kalid       | Instituto D'Or de Pesquisa e Ensino (IDOR), Salvador, Brazil and Rede D'OR São Luiz, Brazil                            |
| David Dearlove                     | Department of Physiology Anatomy and Genetics, University of Oxford, UK                                                |
| Tesfaye Demissie                   | Oxford Vaccine Group, Department of Paediatrics, University of Oxford, UK                                              |
| Amisha Desai                       | Pharmacy Department, University Hospitals Birmingham NHS Foundation Trust                                              |
| Stefania Di Marco                  | Advent SRL, Italy                                                                                                      |
| Claudio Di Maso                    | Oxford Vaccine Group, Department of Paediatrics, University of Oxford, UK                                              |
| Tanya Dinesh                       | Oxford Vaccine Group, Department of Paediatrics, University of Oxford, UK                                              |
| Claire Docksey                     | Cobra Biologics, Keele Science Park, UK                                                                                |
| Tao Dong                           | Chinese Academy of Medical Sciences Oxford Institute, Nuffield Department of Medicine, Oxford University, UK           |
| Francesca R. Donnellan             | Jenner Institute, Nuffield Department of Medicine, University of Oxford, UK                                            |
| Tannyth Gomes Dos Santos           | Centro de Estudos e Pesquisas em Moléstias Infecciosas, Rio Grande do Norte, Brazil                                    |
| Thainá G. dos Santos               | Hospital de Clinicas de Porto Alegre, Universidade Federal do Rio Grande do Sul, Brazil                                |
| Érika Eberlline Pacheco dos Santos | Postgraduate Programme in Nursing, Universidade Federal de Santa Maria, Santa Maria, Brazil                            |
| Naomi Douglas                      | Oxford Vaccine Group, Department of Paediatrics, University of Oxford, UK                                              |
| Charlotte Downing                  | University of Oxford Medical School, Medical Sciences Division, University of Oxford, UK                               |
| Jonathan Drake                     | University of Oxford Medical School, Medical Sciences Division, University of Oxford, UK                               |
| Rachael Drake-Brockman             | Oxford Vaccine Group, Department of Paediatrics, University of Oxford, UK                                              |
| Ruth Elizabeth Drury               | Oxford Vaccine Group, Department of Paediatrics, University of Oxford, UK                                              |
| Joan Du Plessis                    | Family Centre for Research with Ubuntu, Department of Paediatrics, University of Stellenbosch, Cape Town, South Africa |
| Susanna J. Dunachie                | Centre for Tropical Medicine & Global Health, Nuffield Department of Medicine, Oxford, UK                              |

|                         |                                                                                                                                                                     |
|-------------------------|---------------------------------------------------------------------------------------------------------------------------------------------------------------------|
| Andrew D. S. Duncan     | Clinical Infection Research Group, Regional Infectious Diseases Unit, NHS Lothian, UK                                                                               |
| Nicholas J. W. Easom    | Hull University Teaching Hospitals NHS Trust, Hull, UK                                                                                                              |
| Mandy Edwards           | Aneurin Bevan University Health Board, Newport, Wales, UK                                                                                                           |
| Nick J. Edwards         | Jenner Institute, Nuffield Department of Medicine, University of Oxford, UK                                                                                         |
| Frances Edwards         | University Hospitals Bristol & Weston NHS Foundation Trust                                                                                                          |
| Omar M. El Muhanna      | Clinical BioManufacturing Facility, Jenner Institute, University of Oxford, UK                                                                                      |
| Sean C. Elias           | Jenner Institute, Nuffield Department of Medicine, University of Oxford, UK                                                                                         |
| Branwen Ellison-Handley | Clinical Research Facility, Sheffield Teaching Hospitals NHS Foundation Trust, UK                                                                                   |
| Michael J. Elmore       | National Infection Service, Public Health England, UK                                                                                                               |
| Marcus Rex English      | University of Oxford Medical School, Medical Sciences Division, University of Oxford, UK                                                                            |
| Aliasgar Esmail         | Centre for Lung Infection and Immunity, Division of Pulmonology, Department of Medicine and University of Cape Town Lung Institute, South Africa                    |
| Yakub Moosa Essack      | Soweto Clinical Trials Centre, Johannesburg, South Africa                                                                                                           |
| Mutjaba Ghulam Farooq   | Oxford Vaccine Group, Department of Paediatrics, University of Oxford, UK                                                                                           |
| Sofiya Fedosyuk         | Jenner Institute, Nuffield Department of Medicine, University of Oxford, UK                                                                                         |
| Sally Felle             | Oxford Vaccine Group, Department of Paediatrics, University of Oxford, UK                                                                                           |
| Susie Ferguson          | Clinical Infection Research Group, Regional Infectious Diseases Unit, NHS Lothian, UK                                                                               |
| Carla Ferreira Da Silva | Oxford Vaccine Group, Department of Paediatrics, University of Oxford, UK                                                                                           |
| Samantha Field          | Nuffield Department of Population Health, University of Oxford, UK                                                                                                  |
| Richard Fisher          | Clinical BioManufacturing Facility, Jenner Institute, University of Oxford, UK                                                                                      |
| James Fletcher          | NIHR Imperial Clinical Research Facility, London, UK                                                                                                                |
| Hazel Fofie             | Vaccine Institute, Institute of Infection & Immunity, St. Georges, University of London and St Georges University Hospitals NHS Trust, London, UK                   |
| Henry Fok               | NIHR BRC at Guy's and St Thomas' NHS Foundation Trust and King's College London British Heart Foundation Centre, School of Cardiovascular Medicine and Sciences, UK |
| Ross Fothergill         | National Infection Service, Public Health England, UK                                                                                                               |
| Karen J Ford            | Oxford Vaccine Group, Department of Paediatrics, University of Oxford, UK                                                                                           |
| Jamie Fowler            | Jenner Institute, Nuffield Department of Medicine, University of Oxford, UK                                                                                         |
| Pedro H. A. Fraiman     | Centro de Estudos e Pesquisas em Moléstias Infecciosas, Rio Grande do Norte, Brazil                                                                                 |

|                              |                                                                                                                                                                                                 |
|------------------------------|-------------------------------------------------------------------------------------------------------------------------------------------------------------------------------------------------|
| Emma Francis                 | Oxford Vaccine Group, Department of Paediatrics, University of Oxford, UK                                                                                                                       |
| Marília M. Franco            | Instituto D'Or de Pesquisa e Ensino (IDOR), Salvador, Brazil and Rede D'OR São Luiz, Brazil                                                                                                     |
| John Frater                  | Nuffield Department of Medicine, University of Oxford, UK                                                                                                                                       |
| Marilúcia S. M. Freire       | Centro de Estudos e Pesquisas em Moléstias Infecciosas, Rio Grande do Norte, Brazil                                                                                                             |
| Samantha H Fry               | Family Centre for Research with Ubuntu, Department of Paediatrics, University of Stellenbosch, Cape Town, South Africa                                                                          |
| Sabrina Fudge                | University Hospitals Bristol & Weston NHS Foundation Trust                                                                                                                                      |
| Renato Furlan Filho          | Universidade Federal de São Paulo, Brazil                                                                                                                                                       |
| Julie Furze                  | Jenner Institute, Nuffield Department of Medicine, University of Oxford, UK                                                                                                                     |
| Michelle Fuskova             | Jenner Institute, Nuffield Department of Medicine, University of Oxford, UK                                                                                                                     |
| Pablo Galian-Rubio           | Clinical BioManufacturing Facility, Jenner Institute, University of Oxford, UK                                                                                                                  |
| Harriet Garland              | National Infection Service, Public Health England, UK                                                                                                                                           |
| Madita Gavrilă               | Oxford University Hospitals NHS Foundation Trust, Oxford, UK                                                                                                                                    |
| Karyna A. Gibbons            | Oxford University Hospitals NHS Foundation Trust, Oxford, UK                                                                                                                                    |
| Ciaran Gilbride              | Jenner Institute, Nuffield Department of Medicine, University of Oxford, UK                                                                                                                     |
| Hardeep Gill                 | Oxford University Hospitals NHS Foundation Trust, Oxford, UK                                                                                                                                    |
| Kerry Godwin                 | National Infection Service, Public Health England, UK                                                                                                                                           |
| Karishma Gokani              | NIHR/Wellcome Trust Birmingham Clinical Research Facility, Birmingham, UK                                                                                                                       |
| Maria Luisa Freire Gonçalves | Instituto D'Or de Pesquisa e Ensino (IDOR), Salvador, Brazil and Hospital São Rafael, Salvador, Brazil and CEDAP - Centro Estadual Especializado em Diagnóstico, Assistência e Pesquisa, Brazil |
| Isabela G. S. Gonzalez       | Universidade Federal de São Paulo, Brazil                                                                                                                                                       |
| Jack Goodall                 | London Northwest University Healthcare, Northwick Park Hospital, London, UK                                                                                                                     |
| Jayne Goodwin                | Health and Care Research Wales, Cardiff, UK                                                                                                                                                     |
| Amina Goondiwalla            | Soweto Clinical Trials Centre, Johannesburg, South Africa                                                                                                                                       |
| Katherine Gordon-Quayle      | Nuffield Department of Surgical Sciences, University of Oxford, UK                                                                                                                              |
| Giacomo Gorini               | Jenner Institute, Nuffield Department of Medicine, University of Oxford, UK                                                                                                                     |
| Alvaro Goyanna               | Instituto D'Or de Pesquisa e Ensino (IDOR), Rio de Janeiro, Brazil and Hospital Quinta D'OR, Rede D'Or São Luiz, Rio de Janeiro, Brazil                                                         |
| Janet Grab                   | Wits Reproductive Health and HIV Institute, Faculty of Health Sciences, University of the Witwatersrand, Johannesburg, South Africa                                                             |
| Lara Gracie                  | Oxford Vaccine Group, Department of Paediatrics, University of Oxford, UK                                                                                                                       |
| Justin Green                 | AstraZeneca BioPharmaceuticals PLC                                                                                                                                                              |
| Nicola Greenwood             | Jenner Institute, Nuffield Department of Medicine, University of Oxford, UK                                                                                                                     |
| Johann Greffrath             | VIDA - Vaccines and Infectious Diseases Analytical Research Unit, Diepkloof, Soweto, South Africa                                                                                               |

|                           |                                                                                                                                                                                                            |
|---------------------------|------------------------------------------------------------------------------------------------------------------------------------------------------------------------------------------------------------|
| Marisa M. Groenewald      | Family Centre for Research with Ubuntu, Department of Paediatrics, University of Stellenbosch, Cape Town, South Africa                                                                                     |
| Anishka Gunawardene       | London Northwest University Healthcare, Northwick Park Hospital, London, UK                                                                                                                                |
| Gaurav Gupta              | Jenner Institute, Nuffield Department of Medicine, University of Oxford, UK                                                                                                                                |
| Mark Hackett              | University Hospitals Bristol & Weston NHS Foundation Trust                                                                                                                                                 |
| Bassam Hallis             | National Infection Service, Public Health England, UK                                                                                                                                                      |
| Mainga Hamaluba           | KEMRI-Wellcome Trust Research Programme and Centre for Tropical Medicine & Global Health, Nuffield Department of Medicine, Oxford, UK                                                                      |
| Elizabeth Hamilton        | Nuffield Department of Population Health, University of Oxford, UK                                                                                                                                         |
| Joseph Hamlyn             | Oxford Vaccine Group, Department of Paediatrics, University of Oxford, UK                                                                                                                                  |
| Daniel Hammersley         | The University of Nottingham Health Service, Cripps Health Centre, University Park, Nottingham, UK                                                                                                         |
| Aidan T. Hanrath          | Department of Infection and Tropical Medicine, Newcastle upon Tyne Hospitals NHS Foundation Trust and Translational and Clinical Research Institute, Immunity and Inflammation Theme, Newcastle University |
| Brama Hanumunthadu        | Oxford Vaccine Group, Department of Paediatrics, University of Oxford, UK                                                                                                                                  |
| Stephanie A. Harris       | Jenner Institute, Nuffield Department of Medicine, University of Oxford, UK                                                                                                                                |
| Clair Harris              | NIHR BRC at Guy's and St Thomas' NHS Foundation Trust, UK                                                                                                                                                  |
| Thomas D. Harrison        | Department of Infection and Tropical Medicine, Sheffield Teaching Hospitals NHS Foundation Trust, UK                                                                                                       |
| Daisy Harrison            | Oxford Vaccine Group, Department of Paediatrics, University of Oxford, UK                                                                                                                                  |
| Tara A. Harris-Wright     | Oxford University Hospitals NHS Foundation Trust, Oxford, UK                                                                                                                                               |
| Thomas C. Hart            | Oxford Vaccine Group, Department of Paediatrics, University of Oxford, UK                                                                                                                                  |
| Birgit Hartnell           | Vaccines Manufacturing and Innovation Centre, Oxford Science Park, Oxford, UK                                                                                                                              |
| John Haughney             | Clinical Research Facility, Queen Elizabeth University Hospital, Glasgow, UK                                                                                                                               |
| Sophia Hawkins            | Oxford Vaccine Group, Department of Paediatrics, University of Oxford, UK                                                                                                                                  |
| Laís Y. M. Hayano         | Universidade Federal de São Paulo, Brazil                                                                                                                                                                  |
| Ian Head                  | University Hospitals Bristol & Weston NHS Foundation Trust                                                                                                                                                 |
| Paul T. Heath             | Vaccine Institute, Institute of Infection & Immunity, St. Georges, University of London and St Georges University Hospitals NHS Trust, London, UK                                                          |
| John Aaron Henry          | University of Oxford Medical School, Medical Sciences Division, University of Oxford, UK                                                                                                                   |
| Macarena Hermosin Herrera | Oxford University Hospitals NHS Foundation Trust, Oxford, UK                                                                                                                                               |
| David B Hettle            | Infection Sciences, North Bristol NHS Trust, Bristol, UK                                                                                                                                                   |
| Cristhiane Higa           | Universidade Federal de São Paulo, Brazil                                                                                                                                                                  |

|                       |                                                                                                                                                                                                                                           |
|-----------------------|-------------------------------------------------------------------------------------------------------------------------------------------------------------------------------------------------------------------------------------------|
| Jennifer Hill         | Oxford Vaccine Group, Department of Paediatrics, University of Oxford, UK                                                                                                                                                                 |
| Gina Hodges           | Clinical BioManufacturing Facility, Jenner Institute, University of Oxford, UK                                                                                                                                                            |
| Susanne H. Hodgson    | Jenner Institute, Nuffield Department of Medicine, University of Oxford, UK                                                                                                                                                               |
| Elizea Horne          | Wits Reproductive Health and HIV Institute, Faculty of Health Sciences, University of the Witwatersrand, Johannesburg, South Africa                                                                                                       |
| Mimi M. Hou           | Jenner Institute, Nuffield Department of Medicine, University of Oxford, UK                                                                                                                                                               |
| Catherine F. Houlihan | Virology Department, University College London Hospitals NHS Trust, UK and Department of Infection and Immunity, University College London, UK                                                                                            |
| Elizabeth Howe        | Oxford Vaccine Group, Department of Paediatrics, University of Oxford, UK                                                                                                                                                                 |
| Nicola Howell         | Oxford Vaccine Group, Department of Paediatrics, University of Oxford, UK                                                                                                                                                                 |
| Jonathan Humphreys    | Vaccines Manufacturing and Innovation Centre, Oxford Science Park, Oxford, UK                                                                                                                                                             |
| Holly E. Humphries    | National Infection Service, Public Health England, UK                                                                                                                                                                                     |
| Katrina Hurley        | University Hospitals Bristol & Weston NHS Foundation Trust                                                                                                                                                                                |
| Claire Huson          | AstraZeneca BioPharmaceuticals PLC                                                                                                                                                                                                        |
| Catherine Hyams       | Academic Respiratory Unit, University of Bristol, Southmead Hospital, Bristol, UK                                                                                                                                                         |
| Angela Hyder-Wright   | Department of Clinical Sciences, Liverpool School of Tropical Medicine and Liverpool University Hospitals NHS Foundation Trust, UK                                                                                                        |
| Sabina Ikram          | Vaccine Institute, Institute of Infection & Immunity, St. Georges, University of London and St Georges University Hospitals NHS Trust, London, UK                                                                                         |
| Alka Ishwarbhai       | Jenner Institute, Nuffield Department of Medicine, University of Oxford, UK                                                                                                                                                               |
| Poppy Iveson          | University of Oxford Medical School, Medical Sciences Division, University of Oxford, UK                                                                                                                                                  |
| Vidyashankara Iyer    | AstraZeneca BioPharmaceuticals PLC                                                                                                                                                                                                        |
| Frederic Jackson      | Clinical BioManufacturing Facility, Jenner Institute, University of Oxford, UK                                                                                                                                                            |
| Susan Jackson         | Jenner Institute, Nuffield Department of Medicine, University of Oxford, UK                                                                                                                                                               |
| Shameem Jaumdally     | Centre for Lung Infection and Immunity, Division of Pulmonology, Department of Medicine and UCT Lung Institute & South African MRC/UCT Centre for the Study of Antimicrobial Resistance, University of Cape Town, Cape Town, South Africa |
| Helen Jeffers         | Nuffield Department of Medicine, University of Oxford, UK                                                                                                                                                                                 |
| Natasha Jesudason     | MRC-University of Glasgow Centre for Virus Research & Department of Infectious Diseases, Queen Elizabeth University Hospital, UK                                                                                                          |
| Christopher Jones     | Infection Sciences, North Bristol NHS Trust, Bristol, UK                                                                                                                                                                                  |
| Kathryn Jones         | Jenner Institute, Nuffield Department of Medicine, University of Oxford, UK                                                                                                                                                               |

|                          |                                                                                                                                                   |
|--------------------------|---------------------------------------------------------------------------------------------------------------------------------------------------|
| Elizabeth Jones          | Oxford Vaccine Group, Department of Paediatrics, University of Oxford, UK                                                                         |
| Marianna Rocha Jorge     | Instituto D'Or de Pesquisa e Ensino (IDOR), Salvador, Brazil and Rede D'OR São Luiz, Brazil                                                       |
| Amar Joshi               | Pall Europe Ltd, Harbourgate Business Park, Portsmouth, UK                                                                                        |
| Eduardo A. M. S. Júnior  | Centro de Estudos e Pesquisas em Moléstias Infecciosas, Rio Grande do Norte, Brazil                                                               |
| Reshma Kailath           | Jenner Institute, Nuffield Department of Medicine, University of Oxford, UK                                                                       |
| Faeza Kana               | Soweto Clinical Trials Centre, Johannesburg, South Africa                                                                                         |
| Arnab Kar                | London Northwest University Healthcare, Northwick Park Hospital, London, UK                                                                       |
| Konstantinos Karampatsas | Vaccine Institute, Institute of Infection & Immunity, St. Georges, University of London and St Georges University Hospitals NHS Trust, London, UK |
| Mwila Kasanyinga         | Oxford Vaccine Group, Department of Paediatrics, University of Oxford, UK                                                                         |
| Linda J Kay              | Department of Infection, Immunity and Cardiovascular Disease, University of Sheffield                                                             |
| Jade Keen                | Oxford Vaccine Group, Department of Paediatrics, University of Oxford, UK                                                                         |
| Johanna Kellett Wright   | Infection Sciences, North Bristol NHS Trust, Bristol, UK                                                                                          |
| Elizabeth J. Kelly       | AstraZeneca BioPharmaceuticals PLC                                                                                                                |
| Debbie Kelly             | NIHR Clinical Research Network: Thames Valley & South Midlands, UK and Oxford University Hospitals NHS Trust, Oxford, UK                          |
| Dearbhla M Kelly         | Nuffield Department of Clinical Neurosciences, University of Oxford, UK                                                                           |
| Sarah Kelly              | Oxford Vaccine Group, Department of Paediatrics, University of Oxford, UK                                                                         |
| David Kerr               | Oxford Vaccine Group, Department of Paediatrics, University of Oxford, UK                                                                         |
| Liaquat Khan             | Oxford Vaccine Group, Department of Paediatrics, University of Oxford, UK                                                                         |
| Baktash Khozoe           | Jenner Institute, Nuffield Department of Medicine, University of Oxford, UK                                                                       |
| Ankush Khurana           | London Northwest University Healthcare, Northwick Park Hospital, London, UK                                                                       |
| Sarah Kidd               | University Hospitals Bristol & Weston NHS Foundation Trust                                                                                        |
| Annabel Killen           | University of Oxford Medical School, Medical Sciences Division, University of Oxford, UK                                                          |
| Jasmin Kinch             | Oxford Vaccine Group, Department of Paediatrics, University of Oxford, UK                                                                         |
| Patrick Kinch            | Oxford Vaccine Group, Department of Paediatrics, University of Oxford, UK                                                                         |
| Lloyd D. W. King         | Jenner Institute, Nuffield Department of Medicine, University of Oxford, UK                                                                       |
| Thomas B King            | University of Oxford Medical School, Medical Sciences Division, University of Oxford, UK                                                          |

|                          |                                                                                                                                    |
|--------------------------|------------------------------------------------------------------------------------------------------------------------------------|
| Lucy Kingham             | Jenner Institute, Nuffield Department of Medicine, University of Oxford, UK                                                        |
| Paul Klenerman           | Peter Medawar Building for Pathogen Research, NDM Experimental Medicine, University of Oxford, UK                                  |
| Diana M. Kluczna         | Hull University Teaching Hospitals NHS Trust, Hull, UK                                                                             |
| Francesca Knapper        | University Hospitals Bristol & Weston NHS Foundation Trust                                                                         |
| Chanice Knight           | National Infection Service, Public Health England, UK                                                                              |
| Julian C. Knight         | Wellcome Trust Centre for Human Genetics, University of Oxford, UK                                                                 |
| Daniel Knott             | National Infection Service, Public Health England, UK                                                                              |
| Stanislava Koleva        | Oxford Vaccine Group, Department of Paediatrics, University of Oxford, UK                                                          |
| Pedro M. Lages           | Universidade Federal de São Paulo, Brazil                                                                                          |
| Matilda Lang             | London Northwest University Healthcare, Northwick Park Hospital, London, UK                                                        |
| Gail Lang                | Nuffield Dept of Orthopaedics Rheumatology and Musculoskeletal Medicine, University of Oxford, UK                                  |
| Colin W Larkworthy       | Jenner Institute, Nuffield Department of Medicine, University of Oxford, UK                                                        |
| Jessica P J Larwood      | University of Oxford Medical School, Medical Sciences Division, University of Oxford, UK                                           |
| Rebecca Law              | Oxford University Hospitals NHS Foundation Trust, Oxford, UK                                                                       |
| Alison M Lawrie          | Jenner Institute, Nuffield Department of Medicine, University of Oxford, UK                                                        |
| Erica M. Lazarus         | Perinatal HIV Research Unit (PHRU), Faculty of Health Sciences, University of the Witwatersrand, Johannesburg, South Africa        |
| Amanda Leach             | AstraZeneca BioPharmaceuticals PLC                                                                                                 |
| Emily A. Lees            | Oxford Vaccine Group, Department of Paediatrics, University of Oxford, UK                                                          |
| Alice Lelliott           | Oxford Vaccine Group, Department of Paediatrics, University of Oxford, UK                                                          |
| Nana-Marie Lemm          | NIHR Imperial Clinical Research Facility, London, UK                                                                               |
| Álvaro Edson Ramos Lessa | Instituto D'Or de Pesquisa e Ensino (IDOR), Salvador, Brazil and Hospital São Rafael, Salvador, Brazil                             |
| Stephanie Leung          | National Infection Service, Public Health England, UK                                                                              |
| Yuanyuan Li              | Jenner Institute, Nuffield Department of Medicine, University of Oxford, UK                                                        |
| Amelia M. Lias           | Jenner Institute, Nuffield Department of Medicine, University of Oxford, UK                                                        |
| Konstantinos Liatsikos   | Department of Clinical Sciences, Liverpool School of Tropical Medicine and Liverpool University Hospitals NHS Foundation Trust, UK |
| Aline Linder             | Oxford Vaccine Group, Department of Paediatrics, University of Oxford, UK                                                          |
| Samuel Lipworth          | Jenner Institute, Nuffield Department of Medicine, University of Oxford, UK                                                        |
| Shuchang Liu             | Clinical BioManufacturing Facility, Jenner Institute, University of Oxford, UK                                                     |



|                       |                                                                                                                                                                                                                                           |
|-----------------------|-------------------------------------------------------------------------------------------------------------------------------------------------------------------------------------------------------------------------------------------|
| Xinxue Liu            | Oxford Vaccine Group, Department of Paediatrics, University of Oxford, UK                                                                                                                                                                 |
| Adam Lloyd            | Clinical Infection Research Group, Regional Infectious Diseases Unit, NHS Lothian, UK                                                                                                                                                     |
| Stephanie Lloyd       | Oxford University Hospitals NHS Foundation Trust, Oxford, UK                                                                                                                                                                              |
| Lisa Loew             | Clinical BioManufacturing Facility, Jenner Institute, University of Oxford, UK                                                                                                                                                            |
| Raquel Lopez Ramon    | Jenner Institute, Nuffield Department of Medicine, University of Oxford, UK                                                                                                                                                               |
| Leandro Bonecker Lora | Instituto D'Or de Pesquisa e Ensino (IDOR), Rio de Janeiro, Brazil and Hospital Quinta D'OR, Rede D'OR, São Luiz, Rio de Janeiro, Brazil                                                                                                  |
| Kleber Giovanni Luz   | Universidade Federal do Rio Grande do Norte - UFRN, Brazil                                                                                                                                                                                |
| Jonathan C. MacDonald | Department of Gastroenterology, Queen Elizabeth University Hospital, Glasgow, UK                                                                                                                                                          |
| Gordon MacGregor      | Department of Respiratory Medicine, Queen Elizabeth University Hospital, Glasgow, UK                                                                                                                                                      |
| Meera Madhavan        | Jenner Institute, Nuffield Department of Medicine, University of Oxford, UK                                                                                                                                                               |
| David O. Mainwaring   | Pall Europe Ltd, Harbourgate Business Park, Portsmouth, UK                                                                                                                                                                                |
| Edson Makambwa        | Centre for Lung Infection and Immunity, Division of Pulmonology, Department of Medicine and UCT Lung Institute & South African MRC/UCT Centre for the Study of Antimicrobial Resistance, University of Cape Town, Cape Town, South Africa |
| Rebecca Makinson      | Jenner Institute, Nuffield Department of Medicine, University of Oxford, UK                                                                                                                                                               |
| Mookho Malahleha      | Setshababa Research Centre , Tshwane, South Africa                                                                                                                                                                                        |
| Ross Malamatshe       | Setshababa Research Centre , Tshwane, South Africa                                                                                                                                                                                        |
| Garry Mallett         | University of Oxford Medical School, Medical Sciences Division, University of Oxford, UK                                                                                                                                                  |
| Nicola Manning        | University Hospitals Bristol & Weston NHS Foundation Trust                                                                                                                                                                                |
| Kushal Mansatta       | University of Oxford Medical School, Medical Sciences Division, University of Oxford, UK                                                                                                                                                  |
| Takalani Maoko        | Perinatal HIV Research Unit, Faculty of Health Sciences, University of the Witwatersrand, Johannesburg, South Africa                                                                                                                      |
| Spyridoula Marinou    | Oxford Vaccine Group, Department of Paediatrics, University of Oxford, UK                                                                                                                                                                 |
| Emma Marlow           | Jenner Institute, Nuffield Department of Medicine, University of Oxford, UK                                                                                                                                                               |
| Gabriela N. Marques   | Instituto D'Or de Pesquisa e Ensino (IDOR), Salvador, Brazil and Rede D'OR São Luiz, Brazil                                                                                                                                               |
| Paula Marriott        | Kennedy Institute of Rheumatology, Nuffield Department of Orthopaedics, The University of Oxford, UK                                                                                                                                      |
| Richard P. Marshall   | AstraZeneca BioPharmaceuticals PLC                                                                                                                                                                                                        |
| Julia L. Marshall     | Jenner Institute, Nuffield Department of Medicine, University of Oxford, UK                                                                                                                                                               |
| Masebole Masenya      | Wits Reproductive Health and HIV Institute, Faculty of Health Sciences, University of the Witwatersrand, Johannesburg, South Africa                                                                                                       |
| Mduduzi Masilela      | Setshababa Research Centre , Tshwane, South Africa                                                                                                                                                                                        |

|                        |                                                                                                                                     |
|------------------------|-------------------------------------------------------------------------------------------------------------------------------------|
| Shauna K. Masters      | Nuffield Dept of Orthopaedics Rheumatology and Musculoskeletal Medicine, University of Oxford, UK                                   |
| Moncy Mathew           | Pharmacy Clinical Trials (Adult), Guy's and St Thomas NHS Foundation Trust, UK                                                      |
| Hosea Matlebjaane      | Setshababa Research Centre , Tshwane, South Africa                                                                                  |
| Kedidimetse Matshidiso | Perinatal HIV Research Unit, Faculty of Health Sciences, University of the Witwatersrand, Johannesburg, South Africa                |
| Olga Mazur             | Oxford Vaccine Group, Department of Paediatrics, University of Oxford, UK                                                           |
| Andrea Mazzella        | NIHR BRC at Guy's and St Thomas' NHS Foundation Trust, UK                                                                           |
| Hugh McCaughan         | Clinical Infection Research Group, Regional Infectious Diseases Unit, NHS Lothian, UK                                               |
| Joanne McEwan          | Oxford Vaccine Group, Department of Paediatrics, University of Oxford, UK                                                           |
| Joanna McGlashan       | National Infection Service, Public Health England, UK                                                                               |
| Lorna McInroy          | National Infection Service, Public Health England, UK                                                                               |
| Nicky McRobert         | Oxford University Hospitals NHS Foundation Trust, Oxford, UK                                                                        |
| Steve McSwiggan        | Clinical Infection Research Group, Regional Infectious Diseases Unit, NHS Lothian, UK                                               |
| Clare Megson           | Oxford University Hospitals NHS Foundation Trust, Oxford, UK                                                                        |
| Savviz Mehdipour       | NIHR Imperial Clinical Research Facility, London, UK                                                                                |
| Wilma Meijs            | Halix B.V., Tinbergenweg 1, 2333 BB Leiden, Netherlands                                                                             |
| Renata N. Á. Mendonça  | Instituto D'Or de Pesquisa e Ensino (IDOR), Salvador, Brazil and Rede D'OR São Luiz, Brazil                                         |
| Alexander J Mentzer    | Wellcome Centre for Human Genetics, Nuffield Department of Medicine, University of Oxford, UK                                       |
| Patricia Miralhes      | Clinical Microbiology and Virology Department, University College London Hospitals NHS Trust, UK                                    |
| Neginsadat Mirtorabi   | University of Oxford Medical School, Medical Sciences Division, University of Oxford, UK                                            |
| Celia Mitton           | Oxford Vaccine Group, Department of Paediatrics, University of Oxford, UK                                                           |
| Sibusiso Mnyakeni      | Perinatal HIV Research Unit, Faculty of Health Sciences, University of the Witwatersrand, Johannesburg, South Africa                |
| Fiona Moghaddas        | Department of Clinical Immunology, North Bristol NHS Trust, Bristol, UK                                                             |
| Kgaogelo Molapo        | Setshababa Research Centre , Tshwane, South Africa                                                                                  |
| Mapule Moloi           | Wits Reproductive Health and HIV Institute, Faculty of Health Sciences, University of the Witwatersrand, Johannesburg, South Africa |
| Maria Moore            | Oxford Vaccine Group, Department of Paediatrics, University of Oxford, UK                                                           |
| Marni Moran            | Oxford University Hospitals NHS Foundation Trust, Oxford, UK                                                                        |
| Ella Morey             | Oxford Vaccine Group, Department of Paediatrics, University of Oxford, UK                                                           |
| Róisín Morgans         | Clinical BioManufacturing Facility, Jenner Institute, University of Oxford, UK                                                      |
| Susan J. Morris        | Clinical BioManufacturing Facility, Jenner Institute, University of Oxford, UK                                                      |

|                        |                                                                                                                                                                                                                                           |
|------------------------|-------------------------------------------------------------------------------------------------------------------------------------------------------------------------------------------------------------------------------------------|
| Sheila Morris          | Clinical Infection Research Group, Regional Infectious Diseases Unit, NHS Lothian, UK                                                                                                                                                     |
| Hazel Morrison         | Jenner Institute, Nuffield Department of Medicine, University of Oxford, UK                                                                                                                                                               |
| Franca Morselli        | NIHR BRC at Guy's and St Thomas' NHS Foundation Trust, UK                                                                                                                                                                                 |
| Gertraud Morshead      | Oxford Vaccine Group, Department of Paediatrics, University of Oxford, UK                                                                                                                                                                 |
| Richard Morter         | Jenner Institute, Nuffield Department of Medicine, University of Oxford, UK                                                                                                                                                               |
| Lynelle S. Mottay      | Centre for Lung Infection and Immunity, Division of Pulmonology, Department of Medicine and UCT Lung Institute & South African MRC/UCT Centre for the Study of Antimicrobial Resistance, University of Cape Town, Cape Town, South Africa |
| Andrew Moultrie        | VIDA - Vaccines and Infectious Diseases Analytical Research Unit, Diepkloof, Soweto, South Africa                                                                                                                                         |
| Nathifa A. Moyo        | Jenner Institute, Nuffield Department of Medicine, University of Oxford, UK                                                                                                                                                               |
| Mushiya Mpelembue      | London Northwest University Healthcare, Northwick Park Hospital, London, UK                                                                                                                                                               |
| Sibekezelo Msomi       | Perinatal HIV Research Unit, Faculty of Health Sciences, University of the Witwatersrand, Johannesburg, South Africa                                                                                                                      |
| Yvonne N. Mugodi       | Perinatal HIV Research Unit, Faculty of Health Sciences, University of the Witwatersrand, Johannesburg, South Africa                                                                                                                      |
| Ekta Mukhopadhyay      | Jenner Institute, Nuffield Department of Medicine, University of Oxford, UK                                                                                                                                                               |
| Jilly Muller           | Oxford Vaccine Group, Department of Paediatrics, University of Oxford, UK                                                                                                                                                                 |
| Alasdair P.S. Munro    | NIHR Southampton Clinical Research Facility, Southampton, UK                                                                                                                                                                              |
| Sarah Murphy           | Oxford Vaccine Group, Department of Paediatrics, University of Oxford, UK                                                                                                                                                                 |
| Philomena Mweu         | Oxford Vaccine Group, Department of Paediatrics, University of Oxford, UK                                                                                                                                                                 |
| Christopher Myerscough | Department of Clinical Sciences, Liverpool School of Tropical Medicine, Liverpool, UK                                                                                                                                                     |
| Gurudutt Naik          | Aneurin Bevan University Health Board, Newport, Wales, UK                                                                                                                                                                                 |
| Kush Naker             | NIHR/Wellcome Trust Birmingham Clinical Research Facility, Birmingham, UK                                                                                                                                                                 |
| Eleni Nastouli         | Department of Infection, Immunity and Inflammation UCL Great Ormond Street Institute of Child Health, London, UK                                                                                                                          |
| Bongani Ndlovu         | Soweto Clinical Trials Centre, Johannesburg, South Africa                                                                                                                                                                                 |
| Elissavet Nikolaou     | Department of Clinical Sciences, Liverpool School of Tropical Medicine, Liverpool, UK                                                                                                                                                     |
| Cecilia Njenga         | NIHR Imperial Clinical Research Facility, London, UK                                                                                                                                                                                      |
| Helena C. Noal         | Postgraduate Programme in Nursing, Universidade Federal de Santa Maria, Santa Maria, Brazil                                                                                                                                               |
| Andrés Noé             | Jenner Institute, Nuffield Department of Medicine, University of Oxford, UK                                                                                                                                                               |
| Gabrielle Novaes       | Instituto D'Or de Pesquisa e Ensino (IDOR), Rio de Janeiro, Brazil and Hospital Quinta D'OR, Rede D'Or São Luiz, Rio de Janeiro, Brazil                                                                                                   |

|                                 |                                                                                                                                                                  |
|---------------------------------|------------------------------------------------------------------------------------------------------------------------------------------------------------------|
| Fay L Nugent                    | Jenner Institute, Nuffield Department of Medicine, University of Oxford, UK                                                                                      |
| Géssika Lanzillo A. Nunes       | Centro de Estudos e Pesquisas em Moléstias Infecciosas, Rio Grande do Norte, Brazil                                                                              |
| Katie O'Brien                   | Oxford Vaccine Group, Department of Paediatrics, University of Oxford, UK                                                                                        |
| Daniel O'Connor                 | Oxford Vaccine Group, Department of Paediatrics, University of Oxford, UK                                                                                        |
| Suzette Oelofse                 | Centre for Lung Infection and Immunity, Division of Pulmonology, Department of Medicine and UCT Lung Institute, University of Cape Town, Cape Town, South Africa |
| Blanché Oguti                   | Oxford Vaccine Group, Department of Paediatrics, University of Oxford, UK                                                                                        |
| Victoria Olchawski              | Clinical BioManufacturing Facility, Jenner Institute, University of Oxford, UK                                                                                   |
| Neil J Oldfield                 | School of Life Sciences, University of Nottingham, Nottingham, UK                                                                                                |
| Marianne G. Oliveira            | Centro de Estudos e Pesquisas em Moléstias Infecciosas, Rio Grande do Norte, Brazil                                                                              |
| Catarina Oliveira               | Clinical BioManufacturing Facility, Jenner Institute, University of Oxford, UK                                                                                   |
| Isabelle Silva Queiroz Oliveira | Instituto D'Or de Pesquisa e Ensino (IDOR), Salvador, Brazil and Hospital São Rafael, Salvador, Brazil and UNIME, Brazil                                         |
| Aylin Oommen-Jose               | VIDA - Vaccines and Infectious Diseases Analytical Research Unit, Diepkloof, Soweto, South Africa                                                                |
| Angela Oosthuizen               | Wits Reproductive Health and HIV Institute, Faculty of Health Sciences, University of the Witwatersrand, Johannesburg, South Africa                              |
| Paula O'Reilly                  | Hull University Teaching Hospitals NHS Trust, Hull, UK                                                                                                           |
| Peter J. O'Reilly               | Oxford Vaccine Group, Department of Paediatrics, University of Oxford, UK                                                                                        |
| Piper Osborne                   | Oxford Vaccine Group, Department of Paediatrics, University of Oxford, UK                                                                                        |
| David R. J. Owen                | NIHR Imperial Clinical Research Facility, London, UK                                                                                                             |
| Lydia Owen                      | Oxford University Hospitals NHS Foundation Trust, Oxford, UK                                                                                                     |
| Daniel R. Owens                 | NIHR Southampton Clinical Research Facility, Southampton, UK                                                                                                     |
| Nelly Owino                     | Oxford Vaccine Group, Department of Paediatrics, University of Oxford, UK                                                                                        |
| Mihaela Pacurar                 | NIHR Southampton Clinical Research Facility, Southampton, UK                                                                                                     |
| Brenda V. B. Paiva              | Instituto D'Or de Pesquisa e Ensino (IDOR), Rio de Janeiro, Brazil                                                                                               |
| Edna M. F. Palhares             | Centro de Estudos e Pesquisas em Moléstias Infecciosas, Rio Grande do Norte, Brazil                                                                              |
| Susan Palmer                    | Aneurin Bevan University Health Board, Newport, Wales, UK                                                                                                        |
| Helena M. R. T. Parracho        | Clinical BioManufacturing Facility, Jenner Institute, University of Oxford, UK                                                                                   |
| Karen Parsons                   | Oxford University Hospitals NHS Foundation Trust, Oxford, UK                                                                                                     |
| Dipak Patel                     | Clinical Research and Innovation Office, Sheffield Teaching Hospitals NHS Foundation Trust, UK                                                                   |
| Bhumika Patel                   | Oxford Respiratory Trials Unit, Nuffield Department of Medicine, University of Oxford, UK                                                                        |

|                            |                                                                                                                                                                                                                                           |
|----------------------------|-------------------------------------------------------------------------------------------------------------------------------------------------------------------------------------------------------------------------------------------|
| Faezah Patel               | Wits Reproductive Health and HIV Institute, Faculty of Health Sciences, University of the Witwatersrand, Johannesburg, South Africa                                                                                                       |
| Maia Patrick-Smith         | University of Oxford Medical School, Medical Sciences Division, University of Oxford, UK                                                                                                                                                  |
| Ruth O. Payne              | Department of Infection and Tropical Medicine, Sheffield Teaching Hospitals NHS Foundation Trust and the Department of Infection, Immunity and Cardiovascular Disease, University of Sheffield, UK                                        |
| Yanchun Peng               | MRC Weatherall Institute of Molecular Medicine, NDM Experimental Medicine, University of Oxford, UK                                                                                                                                       |
| Elizabeth J. Penn          | National Infection Service, Public Health England, UK                                                                                                                                                                                     |
| Anna Pennington            | Aneurin Bevan University Health Board, Newport, Wales, UK                                                                                                                                                                                 |
| Marco Polo Peralta Alvarez | Jenner Institute, Nuffield Department of Medicine, University of Oxford, UK                                                                                                                                                               |
| Bruno Pereira Stuchi       | Instituto D'Or de Pesquisa e Ensino (IDOR), Rio de Janeiro, Brazil                                                                                                                                                                        |
| Ana Luiza Perez            | Hospital de Clinicas de Porto Alegre, Universidade Federal do Rio Grande do Sul, Brazil                                                                                                                                                   |
| Tanaraj Perinpanathan      | Hull University Teaching Hospitals NHS Trust, Hull, UK                                                                                                                                                                                    |
| James Perring              | University of Oxford Medical School, Medical Sciences Division, University of Oxford, UK                                                                                                                                                  |
| Rubeshan Perumal           | Centre for Lung Infection and Immunity, Division of Pulmonology, Department of Medicine and UCT Lung Institute & South African MRC/UCT Centre for the Study of Antimicrobial Resistance, University of Cape Town, Cape Town, South Africa |
| Sahir Yusuf Petkar         | Soweto Clinical Trials Centre, Johannesburg, South Africa                                                                                                                                                                                 |
| Tricia Philip              | Perinatal HIV Research Unit, Faculty of Health Sciences, University of the Witwatersrand, Johannesburg, South Africa                                                                                                                      |
| Jennifer Phillips          | University Hospitals Bristol & Weston NHS Foundation Trust                                                                                                                                                                                |
| Mary Kgomo Phohu           | Setshababa Research Centre, Tshwane, South Africa                                                                                                                                                                                         |
| Lorinda Pickup             | NIHR Cambridge Clinical Research Facility, Cambridge, UK                                                                                                                                                                                  |
| Sonja Pieterse             | Family Centre for Research with Ubuntu, Department of Paediatrics, University of Stellenbosch, Cape Town, South Africa                                                                                                                    |
| Jessica Morgana Pinheiro   | Hospital de Clinicas de Porto Alegre, Universidade Federal do Rio Grande do Sul, Brazil                                                                                                                                                   |
| Jo Piper                   | NIHR Cambridge Clinical Research Facility, Cambridge, UK                                                                                                                                                                                  |
| Dimitra Pipini             | Jenner Institute, Nuffield Department of Medicine, University of Oxford, UK                                                                                                                                                               |
| Mary Plank                 | AstraZeneca BioPharmaceuticals PLC                                                                                                                                                                                                        |
| Sinéad Plant               | Clinical Infection Research Group, Regional Infectious Diseases Unit, NHS Lothian, UK                                                                                                                                                     |
| Samuel Pollard             | Oxford Vaccine Group, Department of Paediatrics, University of Oxford, UK                                                                                                                                                                 |
| Jennifer Pooley            | North Bristol NHS Trust, Bristol, UK                                                                                                                                                                                                      |
| Anil Pooran                | Centre for Lung Infection and Immunity, Division of Pulmonology, Department of Medicine and UCT Lung Institute & South African MRC/UCT Centre for the Study of Antimicrobial Resistance, University of Cape Town, Cape Town, South Africa |
| Ian Poulton                | Jenner Institute, Nuffield Department of Medicine, University of Oxford, UK                                                                                                                                                               |

|                             |                                                                                                                                                   |
|-----------------------------|---------------------------------------------------------------------------------------------------------------------------------------------------|
| Claire Powers               | Jenner Institute, Nuffield Department of Medicine, University of Oxford, UK                                                                       |
| Fernando B. Presa           | Centro de Estudos e Pesquisas em Moléstias Infecciosas, Rio Grande do Norte, Brazil                                                               |
| David A. Price              | Department of Infection and Tropical Medicine, Newcastle upon Tyne Hospitals NHS Foundation Trust, UK                                             |
| Vivien Price                | NIHR/Wellcome Trust Birmingham Clinical Research Facility, Birmingham, UK                                                                         |
| Marcelo R. Primeira         | Postgraduate Programme in Nursing, Universidade Federal de Santa Maria, Santa Maria, Brazil                                                       |
| Pamela C. Proud             | National Infection Service, Public Health England, UK                                                                                             |
| Samuel Provstgaard-Morys    | Oxford Vaccine Group, Department of Paediatrics, University of Oxford, UK                                                                         |
| Sophie Pueschel             | Oxford University Hospitals NHS Foundation Trust, Oxford, UK                                                                                      |
| David Pulido                | Jenner Institute, Nuffield Department of Medicine, University of Oxford, UK                                                                       |
| Sheena Quaid                | London Northwest University Healthcare, Northwick Park Hospital, London, UK                                                                       |
| Ria Rabara                  | Oxford University Hospitals NHS Foundation Trust, Oxford, UK                                                                                      |
| Kajal Radia                 | University of Oxford Medical School, Medical Sciences Division, University of Oxford, UK                                                          |
| Durga Rajapaksa             | National Infection Service, Public Health England, UK                                                                                             |
| Thurkka Rajeswaran          | NIHR BRC at Guy's and St Thomas' NHS Foundation Trust, UK                                                                                         |
| Leonardo M. Ramos           | Instituto D'Or de Pesquisa e Ensino (IDOR), Rio de Janeiro, Brazil                                                                                |
| Alberto San Francisco Ramos | Vaccine Institute, Institute of Infection & Immunity, St. Georges, University of London and St Georges University Hospitals NHS Trust, London, UK |
| Fernando Ramos Lopez        | Jenner Institute, Nuffield Department of Medicine, University of Oxford, UK                                                                       |
| Tommy Rampling              | Clinical Microbiology and Virology Department, University College London Hospitals NHS Trust, UK                                                  |
| Jade Rand                   | NIHR Southampton Clinical Research Facility, Southampton, UK                                                                                      |
| Helen Ratcliffe             | Oxford Vaccine Group, Department of Paediatrics, University of Oxford, UK                                                                         |
| Thomas Rawlinson            | Jenner Institute, Nuffield Department of Medicine, University of Oxford, UK                                                                       |
| David Rea                   | Clinical Research Network, West of England, UK                                                                                                    |
| Byron Rees                  | Pall Europe Ltd, Harbourgate Business Park, Portsmouth, UK                                                                                        |
| Mila Resuello-Dauti         | NIHR UCLH Clinical Research Facility, London, UK                                                                                                  |
| Emilia Reyes Pabon          | Clinical BioManufacturing Facility, Jenner Institute, University of Oxford, UK                                                                    |
| Sarah Rhead                 | Oxford Vaccine Group, Department of Paediatrics, University of Oxford, UK                                                                         |
| Tawassal Riaz               | Infection Sciences, North Bristol NHS Trust, Bristol, UK                                                                                          |
| Marivic Ricamara            | NIHR UCLH Clinical Research Facility, London, UK                                                                                                  |
| Alexander J Richards        | Hull University Teaching Hospitals NHS Trust, Hull, UK                                                                                            |
| Alex Richter                | NIHR/Wellcome Trust Birmingham Clinical Research Facility & Institute of Immunology and Immunotherapy, University of Birmingham, UK               |

|                        |                                                                                                                                    |
|------------------------|------------------------------------------------------------------------------------------------------------------------------------|
| Neil D. Ritchie        | Department of Infectious Diseases, Queen Elizabeth University Hospital, Glasgow, UK                                                |
| Alexander J. Robbins   | NIHR Imperial Clinical Research Facility, London, UK                                                                               |
| Hannah Roberts         | Oxford Vaccine Group, Department of Paediatrics, University of Oxford, UK                                                          |
| Ryan E Robinson        | Department of Clinical Sciences, Liverpool School of Tropical Medicine and Liverpool University Hospitals NHS Foundation Trust, UK |
| Sophie Roche           | University of Oxford Medical School, Medical Sciences Division, University of Oxford, UK                                           |
| Christine S. Rollier   | Oxford Vaccine Group, Department of Paediatrics, University of Oxford, UK                                                          |
| Louisa Rose            | Jenner Institute, Nuffield Department of Medicine, University of Oxford, UK                                                        |
| Amy L. Ross Russell    | NIHR Southampton Clinical Research Facility, Southampton, UK                                                                       |
| Lindie Rossouw         | Family Centre for Research with Ubuntu, Department of Paediatrics, University of Stellenbosch, Cape Town, South Africa             |
| Simon Royal            | School of Medicine, Division of Primary Care, University of Nottingham, Nottingham, UK                                             |
| Indra Rudiansyah       | Jenner Institute, Nuffield Department of Medicine, University of Oxford, UK                                                        |
| Kim Ryalls             | Pharmacy Department, Sheffield Teaching Hospitals NHS Foundation Trust                                                             |
| Charlotte E. Sabine    | NIHR/Wellcome Trust Birmingham Clinical Research Facility, Birmingham, UK                                                          |
| Stephen Saich          | NIHR Southampton Clinical Research Facility, Southampton, UK                                                                       |
| Jessica C Sale         | NIHR/Wellcome Trust Birmingham Clinical Research Facility, Birmingham, UK                                                          |
| Ahmed M. Salman        | Jenner Institute, Nuffield Department of Medicine, University of Oxford, UK                                                        |
| Natalia Salvador       | Instituto D'Or de Pesquisa e Ensino (IDOR), Rio de Janeiro, Brazil                                                                 |
| Stephannie Salvador    | Jenner Institute, Nuffield Department of Medicine, University of Oxford, UK                                                        |
| Milla Dias Sampaio     | Instituto D'Or de Pesquisa e Ensino (IDOR), Salvador, Brazil and Rede D'OR São Luiz, Brazil                                        |
| Annette D Samson       | Hull University Teaching Hospitals NHS Trust, Hull, UK                                                                             |
| Amada Sanchez-Gonzalez | Department of Infection and Tropical Medicine, Newcastle upon Tyne Hospitals NHS Foundation Trust, UK                              |
| Helen Sanders          | Jenner Institute, Nuffield Department of Medicine, University of Oxford, UK                                                        |
| Katherine Sanders      | Oxford Vaccine Group, Department of Paediatrics, University of Oxford, UK                                                          |
| Erika E. P. D. Santos  | Postgraduate Programme in Nursing, Universidade Federal de Santa Maria, Santa Maria, Brazil                                        |
| Mayara F. S. Guerra    | Instituto D'Or de Pesquisa e Ensino (IDOR), Rio de Janeiro, Brazil                                                                 |
| Iman Satti             | Jenner Institute, Nuffield Department of Medicine, University of Oxford, UK                                                        |
| Jack E. Saunders       | Jenner Institute, Nuffield Department of Medicine, University of Oxford, UK                                                        |

|                           |                                                                                                                                                                                                            |
|---------------------------|------------------------------------------------------------------------------------------------------------------------------------------------------------------------------------------------------------|
| Caroline Saunders         | NIHR Cambridge Clinical Research Facility, Cambridge, UK                                                                                                                                                   |
| Aakifah Bibi Arif Sayed   | Perinatal HIV Research Unit, Faculty of Health Sciences, University of the Witwatersrand, Johannesburg, South Africa                                                                                       |
| Ina Schim van der Loeff   | Department of Infection and Tropical Medicine, Newcastle upon Tyne Hospitals NHS Foundation Trust and Translational and Clinical Research Institute, Immunity and Inflammation Theme, Newcastle University |
| Annina B Schmid           | Nuffield Department of Clinical Neurosciences, University of Oxford, UK                                                                                                                                    |
| Ella Schofield            | University of Oxford Medical School, Medical Sciences Division, University of Oxford, UK                                                                                                                   |
| Gavin R. Screaton         | Medical Sciences, University of Oxford, UK                                                                                                                                                                 |
| Samiullah Seddiqi         | Oxford Vaccine Group, Department of Paediatrics, University of Oxford, UK                                                                                                                                  |
| Rameswara R. Segireddy    | Jenner Institute, Nuffield Department of Medicine, University of Oxford, UK                                                                                                                                |
| Roberta Senger            | Hospital Universitário de Santa Maria, Santa Maria, Brazil                                                                                                                                                 |
| Sonia Serrano             | NIHR BRC at Guy's and St Thomas' NHS Foundation Trust, UK                                                                                                                                                  |
| Imam Shaik                | National Infection Service, Public Health England, UK                                                                                                                                                      |
| Hannah R. Sharpe          | Jenner Institute, Nuffield Department of Medicine, University of Oxford, UK                                                                                                                                |
| Katherine Sharrocks       | Department of Medicine, University of Cambridge, UK                                                                                                                                                        |
| Robert Shaw               | Oxford Vaccine Group, Department of Paediatrics, University of Oxford, UK                                                                                                                                  |
| Adam Shea                 | Jenner Institute, Nuffield Department of Medicine, University of Oxford, UK                                                                                                                                |
| Emma Sheehan              | Jenner Institute, Nuffield Department of Medicine, University of Oxford, UK                                                                                                                                |
| Amy Shepherd              | Clinical Infection Research Group, Regional Infectious Diseases Unit, NHS Lothian, UK                                                                                                                      |
| Farah Shiham              | Department of Clinical Sciences, Liverpool School of Tropical Medicine and Liverpool University Hospitals NHS Foundation Trust, UK                                                                         |
| Sarah E. Silk             | Jenner Institute, Nuffield Department of Medicine, University of Oxford, UK                                                                                                                                |
| Ana Carolina Mesquita     | Instituto D'Or de Pesquisa e Ensino (IDOR), Rio de Janeiro, Brazil and Hospital Quinta D'OR, Rede D'Or São Luiz, Rio de Janeiro, Brazil                                                                    |
| Laura Silva-Reyes         | Oxford Vaccine Group, Department of Paediatrics, University of Oxford, UK                                                                                                                                  |
| Lidiana B. T. D. Silveira | Postgraduate Programme in Nursing, Universidade Federal de Santa Maria, Santa Maria, Brazil                                                                                                                |
| Mariana B. V. Silveira    | Universidade Federal de São Paulo, Brazil                                                                                                                                                                  |
| Nisha Singh               | Oxford Vaccine Group, Department of Paediatrics, University of Oxford, UK                                                                                                                                  |
| Jaisi Sinha               | Public Health Wales NHS Trust, Cardiff, UK                                                                                                                                                                 |
| Donal T Skelly            | Nuffield Department of Clinical Neurosciences, University of Oxford, UK                                                                                                                                    |
| Daniel C. Smith           | Cobra Biologics, Keele Science Park, UK                                                                                                                                                                    |
| Nicholas Smith            | Cobra Biologics, Keele Science Park, UK                                                                                                                                                                    |



|                           |                                                                                                                                                   |
|---------------------------|---------------------------------------------------------------------------------------------------------------------------------------------------|
| Holly E. Smith            | Jenner Institute, Nuffield Department of Medicine, University of Oxford, UK                                                                       |
| David J Smith             | Oxford Vaccine Group, Department of Paediatrics, University of Oxford, UK                                                                         |
| Catherine C Smith         | Oxford Vaccine Group, Department of Paediatrics, University of Oxford, UK                                                                         |
| Airanuédida S. Soares     | Centro de Estudos e Pesquisas em Moléstias Infecciosas, Rio Grande do Norte, Brazil                                                               |
| Carla Solórzano           | Department of Clinical Sciences, Liverpool School of Tropical Medicine, UK                                                                        |
| Guilherme L. Sorio        | Hospital de Clinicas de Porto Alegre, Universidade Federal do Rio Grande do Sul, Brazil                                                           |
| Kim Sorley                | NIHR Imperial Clinical Research Facility, London, UK                                                                                              |
| Tiffany Sosa-Rodriguez    | Halix B.V., Tinbergenweg 1, 2333 BB Leiden, Netherlands                                                                                           |
| Cinthia M. C. D. L. Souza | Centro de Estudos e Pesquisas em Moléstias Infecciosas, Rio Grande do Norte, Brazil                                                               |
| Bruno S. D. F. Souza      | Gonçalo Moniz Institute (Fiocruz); D'Or Institute for Research and Education (IDOR), Salvador, Brazil                                             |
| Alessandra R. Souza       | Universidade Federal de São Paulo, Brazil                                                                                                         |
| Thamyres Souza Lopes      | Instituto D'Or de Pesquisa e Ensino (IDOR), Rio de Janeiro, Brazil                                                                                |
| Luciana Sowole            | NIHR BRC at Guy's and St Thomas' NHS Foundation Trust, UK                                                                                         |
| Alexandra J Spencer       | Jenner Institute, Nuffield Department of Medicine, University of Oxford, UK                                                                       |
| Louise Spoors             | Nuffield Dept of Orthopaedics Rheumatology and Musculoskeletal Medicine, University of Oxford, UK                                                 |
| Lizzie Stafford           | Nuffield Department of Medicine, University of Oxford, UK                                                                                         |
| Imogen Stamford           | Oxford University Hospitals NHS Foundation Trust, Oxford, UK                                                                                      |
| Ricardo Stein             | Hospital de Clinicas de Porto Alegre, Universidade Federal do Rio Grande do Sul, Brazil                                                           |
| Lisa Stockdale            | Oxford Vaccine Group, Department of Paediatrics, University of Oxford, UK                                                                         |
| Lisa V. Stockwell         | Oxford Vaccine Group, Department of Paediatrics, University of Oxford, UK                                                                         |
| Louise H. Strickland      | Nuffield Dept of Orthopaedics Rheumatology and Musculoskeletal Medicine, University of Oxford, UK                                                 |
| Arabella S. V. Stuart     | Oxford Vaccine Group, Department of Paediatrics, University of Oxford, UK                                                                         |
| Ann Sturdy                | London Northwest University Healthcare, Northwick Park Hospital, London, UK                                                                       |
| Natalina Sutton           | Vaccine Institute, Institute of Infection & Immunity, St. Georges, University of London and St Georges University Hospitals NHS Trust, London, UK |
| Anna Szigeti              | Oxford Vaccine Group, Department of Paediatrics, University of Oxford, UK                                                                         |
| Abdessamad Tahiri-Alaoui  | Clinical BioManufacturing Facility, Jenner Institute, University of Oxford, UK                                                                    |
| Rachel Tanner             | Jenner Institute, Nuffield Department of Medicine, University of Oxford, UK                                                                       |

|                           |                                                                                                                                                                                                                                           |
|---------------------------|-------------------------------------------------------------------------------------------------------------------------------------------------------------------------------------------------------------------------------------------|
| Carol Taoushanis          | VIDA - Vaccines and Infectious Diseases Analytical Research Unit, Diepkloof, Soweto, South Africa                                                                                                                                         |
| Alexander W Tarr          | School of Life Sciences, University of Nottingham, Nottingham, UK & NIHR Nottingham Biomedical Research Centre, Nottingham University Hospitals NHS Trust, Nottingham, UK                                                                 |
| Richard Tarrant           | Clinical BioManufacturing Facility, Jenner Institute, University of Oxford, UK                                                                                                                                                            |
| Keja Taylor               | Clinical BioManufacturing Facility, Jenner Institute, University of Oxford, UK                                                                                                                                                            |
| Ursula Taylor             | Department of Paediatrics, University of Oxford, UK                                                                                                                                                                                       |
| Iona Jennifer Taylor      | Jenner Institute, Nuffield Department of Medicine, University of Oxford, UK                                                                                                                                                               |
| Justin Taylor             | Oxford Vaccine Group, Department of Paediatrics, University of Oxford, UK                                                                                                                                                                 |
| Rebecca te Water Naude    | University of Oxford Medical School, Medical Sciences Division, University of Oxford, UK                                                                                                                                                  |
| Kate Templeton            | NHS Lothian, Edinburgh, UK                                                                                                                                                                                                                |
| Yrene Themistocleous      | Jenner Institute, Nuffield Department of Medicine, University of Oxford, UK                                                                                                                                                               |
| Andreas Themistocleous    | Nuffield Department of Clinical Neurosciences, University of Oxford, UK                                                                                                                                                                   |
| Merin Thomas              | Jenner Institute, Nuffield Department of Medicine, University of Oxford, UK                                                                                                                                                               |
| Kelly M Thomas            | National Infection Service, Public Health England, UK                                                                                                                                                                                     |
| Tonia M Thomas            | Oxford Vaccine Group, Department of Paediatrics, University of Oxford, UK                                                                                                                                                                 |
| Asha Thombrayil           | VIDA - Vaccines and Infectious Diseases Analytical Research Unit, Diepkloof, Soweto, South Africa                                                                                                                                         |
| Julia Thompson            | AstraZeneca BioPharmaceuticals PLC                                                                                                                                                                                                        |
| Fawziyah Thompson         | Centre for Lung Infection and Immunity, Division of Pulmonology, Department of Medicine and UCT Lung Institute & South African MRC/UCT Centre for the Study of Antimicrobial Resistance, University of Cape Town, Cape Town, South Africa |
| Ameeka Thompson           | North Bristol NHS Trust, Bristol, UK                                                                                                                                                                                                      |
| Amber J Thompson          | Oxford Vaccine Group, Department of Paediatrics, University of Oxford, UK                                                                                                                                                                 |
| Kevin P Thompson          | Pall Europe Ltd, Harbourgate Business Park, Portsmouth, UK                                                                                                                                                                                |
| Viv Thornton-Jones        | Oxford University Hospitals NHS Foundation Trust, Oxford, UK                                                                                                                                                                              |
| Larissa H. S. Thotusi     | Universidade Federal de São Paulo, Brazil                                                                                                                                                                                                 |
| Patrick J Tighe           | School of Life Sciences, University of Nottingham, Nottingham, UK                                                                                                                                                                         |
| Lygia Accioly Tinoco      | Instituto D'Or de Pesquisa e Ensino (IDOR), Salvador, Brazil and Rede D'OR São Luiz, Brazil                                                                                                                                               |
| Gerlynn Ferreras Tiongson | London Northwest University Healthcare, Northwick Park Hospital, London, UK                                                                                                                                                               |
| Bonolo Tladinyane         | Setshababa Research Centre , Tshwane, South Africa                                                                                                                                                                                        |
| Michele Tomasicchio       | Centre for Lung Infection and Immunity, Division of Pulmonology, Department of Medicine and UCT Lung Institute & South African                                                                                                            |

|                       |                                                                                                                                     |
|-----------------------|-------------------------------------------------------------------------------------------------------------------------------------|
|                       | MRC/UCT Centre for the Study of Antimicrobial Resistance, University of Cape Town, Cape Town, South Africa                          |
| Adriana Tomic         | Oxford Vaccine Group, Department of Paediatrics, University of Oxford, UK                                                           |
| Susan Tonks           | Oxford Vaccine Group, Department of Paediatrics, University of Oxford, UK                                                           |
| James Towner          | University of Oxford Medical School, Medical Sciences Division, University of Oxford, UK                                            |
| Nguyen Tran           | Jenner Institute, Nuffield Department of Medicine, University of Oxford, UK                                                         |
| Julia A. Tree         | National Infection Service, Public Health England, UK                                                                               |
| Gerardo Trillana      | NIHR BRC at Guy's and St Thomas' NHS Foundation Trust, UK                                                                           |
| Charlotte Trinham     | NIHR/Wellcome Trust Birmingham Clinical Research Facility, Birmingham, UK                                                           |
| Rose Trivett          | Oxford Vaccine Group, Department of Paediatrics, University of Oxford, UK                                                           |
| Adam Truby            | Jenner Institute, Nuffield Department of Medicine, University of Oxford, UK                                                         |
| Betty Lebogang Tsheko | Soweto Clinical Trials Centre, Johannesburg, South Africa                                                                           |
| Philippa Tubb         | Department of Clinical Sciences, Liverpool School of Tropical Medicine, Liverpool, UK                                               |
| Aadil El-Turabi       | Jenner Institute, Nuffield Department of Medicine, University of Oxford, UK                                                         |
| Richard Turner        | AstraZeneca BioPharmaceuticals PLC                                                                                                  |
| Cheryl Turner         | Jenner Institute, Nuffield Department of Medicine, University of Oxford, UK                                                         |
| Nicola Turner         | NIHR UCLH Clinical Research Facility, London, UK                                                                                    |
| Bhavya Tyagi          | London Northwest University Healthcare, Northwick Park Hospital, London, UK                                                         |
| Marta Ulaszewska      | Jenner Institute, Nuffield Department of Medicine, University of Oxford, UK                                                         |
| Benjamin R. Underwood | Windsor Research Unit, Cambridge and Peterborough NHS Foundation Trust, UK                                                          |
| Samual van Eck        | Wits Reproductive Health and HIV Institute, Faculty of Health Sciences, University of the Witwatersrand, Johannesburg, South Africa |
| Rachel Varughese      | Oxford Vaccine Group, Department of Paediatrics, University of Oxford, UK                                                           |
| Dennis Verbart        | Halix B.V., Tinbergenweg 1, 2333 BB Leiden, Netherlands                                                                             |
| Marije K Verheul      | Oxford Vaccine Group, Department of Paediatrics, University of Oxford, UK                                                           |
| Iason Vichos          | Oxford Vaccine Group, Department of Paediatrics, University of Oxford, UK                                                           |
| Taiane A Vieira       | Hospital de Clinicas de Porto Alegre, Universidade Federal do Rio Grande do Sul, Brazil                                             |
| Gemma Walker          | Hull University Teaching Hospitals NHS Trust, Hull, UK                                                                              |
| Laura Walker          | Oxford Vaccine Group, Department of Paediatrics, University of Oxford, UK                                                           |
| Matthew E Wand        | National Infection Service, Public Health England, UK                                                                               |

|                          |                                                                                                                                                            |
|--------------------------|------------------------------------------------------------------------------------------------------------------------------------------------------------|
| Theresa Wardell          | Oxford Biomedica PLC, Transport Way, Cowley, Oxford                                                                                                        |
| George M. Warimwe        | KEMRI-Wellcome Trust Research Programme, Kenya and Centre for Tropical Medicine & Global Health, Nuffield Department of Medicine, University of Oxford, UK |
| Sarah C. Warren          | NIHR Southampton Clinical Research Facility, Southampton, UK                                                                                               |
| Bridget Watkins          | Nuffield Dept of Orthopaedics Rheumatology and Musculoskeletal Medicine, University of Oxford, UK                                                          |
| Marion E. E. Watson      | Jenner Institute, Nuffield Department of Medicine, University of Oxford, UK                                                                                |
| Ekaterina Watson         | London Northwest University Healthcare, Northwick Park Hospital, London, UK                                                                                |
| Stewart Webb             | Department of Neurology, Queen Elizabeth University Hospital, Glasgow, UK                                                                                  |
| Andrea Webster           | Research Directorate, Newcastle upon Tyne Hospitals NHS Foundation Trust, UK                                                                               |
| Jessica Welch            | Oxford University Hospitals NHS Foundation Trust, Oxford, UK                                                                                               |
| Zoe Wellbelove           | Hull University Teaching Hospitals NHS Trust, Hull, UK                                                                                                     |
| Jeanette H. Wells        | Aneurin Bevan University Health Board, Newport, Wales, UK                                                                                                  |
| Alison J. West           | Oxford University Hospitals NHS Foundation Trust, Oxford, UK                                                                                               |
| Beth White               | Department of Infectious Diseases, Queen Elizabeth University Hospital, Glasgow, UK                                                                        |
| Caroline White           | Oxford Vaccine Group, Department of Paediatrics, University of Oxford, UK                                                                                  |
| Rachel White             | Oxford Vaccine Group, Department of Paediatrics, University of Oxford, UK                                                                                  |
| Paul Williams            | Clinical BioManufacturing Facility, Jenner Institute, University of Oxford, UK                                                                             |
| Rachel L Williams        | Research & Innovation, North Bristol NHS Trust, Bristol, UK                                                                                                |
| Silvia Madrid Willingham | Hull University Teaching Hospitals NHS Trust, Hull, UK                                                                                                     |
| Rebecca L. Winslow       | NIHR/Wellcome Trust Birmingham Clinical Research Facility, Birmingham, UK                                                                                  |
| Danielle Woods           | Jenner Institute, Nuffield Department of Medicine, University of Oxford, UK                                                                                |
| Mark Woodyer             | Oxford Biomedica PLC, Transport Way, Cowley, Oxford, UK                                                                                                    |
| Andrew T. Worth          | Jenner Institute, Nuffield Department of Medicine, University of Oxford, UK                                                                                |
| Daniel Wright            | Jenner Institute, Nuffield Department of Medicine, University of Oxford, UK                                                                                |
| Marzena Wroblewska       | Jenner Institute, Nuffield Department of Medicine, University of Oxford, UK                                                                                |
| Xin Li Yao               | Oxford Vaccine Group, Department of Paediatrics, University of Oxford, UK                                                                                  |
| Yee Ting Nicole Yim      | NIHR UCLH Clinical Research Facility, London, UK                                                                                                           |
| Marina Bauer Zambrano    | Hospital de Clinicas de Porto Alegre, Universidade Federal do Rio Grande do Sul, Brazil                                                                    |
| Rafael Leal Zimmer       | Hospital de Clinicas de Porto Alegre, Universidade Federal do Rio Grande do Sul, Brazil                                                                    |

|                 |                                                                                                                        |
|-----------------|------------------------------------------------------------------------------------------------------------------------|
| Dalila Zizi     | Clinical BioManufacturing Facility, Jenner Institute, University of Oxford, UK                                         |
| Peter Zuidewind | Family Centre for Research with Ubuntu, Department of Paediatrics, University of Stellenbosch, Cape Town, South Africa |

## Acknowledgements

|                                                                         |
|-------------------------------------------------------------------------|
| <b>Advent, South Africa</b>                                             |
| Michael Breese                                                          |
| <b>BioIndustry Association</b>                                          |
| Annette England                                                         |
| Ian McCubbin                                                            |
| <b>Cell &amp; Gene Therapy Catapult</b>                                 |
| Stephen Ward                                                            |
| <b>CobraBio</b>                                                         |
| Mike Austin                                                             |
| Richard Condliffe                                                       |
| Peter Coleman                                                           |
| Steve Garland                                                           |
| Philip Ridley-Smith                                                     |
| <b>Clinical Trials Research Governance Office, University of Oxford</b> |
| Ronja Bahadori                                                          |
| Elaine Chick                                                            |
| Heather House                                                           |
| Claire Riddle                                                           |
| <b>Data and Safety Monitoring Board (DSMB)</b>                          |
| George Bouliotis                                                        |
| Steve Black                                                             |
| Elizabeth Bukusi                                                        |
| Cornelia Dekker                                                         |
| Robert Heyderman                                                        |
| Gregory Hussey                                                          |
| Paul Kaye                                                               |
| Bernhards Ogutu                                                         |
| Walter Orenstein                                                        |
| Sonia Ramos                                                             |
| Manish Sadarangani                                                      |
| <b>Deloitte UK</b>                                                      |
| Alex Hope                                                               |
| <b>Department of Health and Social Care, UK Government</b>              |
| Harry Mayhew                                                            |
| Martin Shanahan                                                         |

|                                                              |
|--------------------------------------------------------------|
| <b>Department of Paediatrics, University of Oxford</b>       |
| Joanna Bagniewska                                            |
| Elizabeth Derow                                              |
| Georg A. Holländer                                           |
| Samantha Vanderslott                                         |
| <b>Endpoint Evaluation Committee</b>                         |
| Jeremy Carr                                                  |
| Stephen Chambers                                             |
| Kim Davis                                                    |
| Simon Drysdale                                               |
| Malick Gibani                                                |
| Elizabeth Hammershaimb                                       |
| Michael Harrington                                           |
| Celina Jin                                                   |
| Seilesh Kadambari                                            |
| Rama Kandasamy                                               |
| Toby Maher                                                   |
| Jamilah Meghji                                               |
| Claire Munro <sup>a</sup>                                    |
| David Pace                                                   |
| Rekha R. Rapaka                                              |
| Robindra Basu Roy                                            |
| Daniel Silman                                                |
| Gemma Sinclair                                               |
| Jing Wang                                                    |
| <b>Halix</b>                                                 |
| Thijs Booiman                                                |
| James Harris                                                 |
| Alex Huybens                                                 |
| <b>The Cambridge NIHR CRF COVID Vaccine Group</b>            |
| <b>The GSTT NIHR CRF COVID Vaccine Group</b>                 |
| <b>The Imperial CRF COVID Vaccine Group</b>                  |
| <b>Jenner Institute, University of Oxford</b>                |
| Iona Tarbet                                                  |
| <b>Nuffield Department of Medicine, University of Oxford</b> |
| Joshua Burgoyne                                              |
| Richard Cornall                                              |
| Richard Liwicki                                              |

|                                                                     |
|---------------------------------------------------------------------|
| Denis Murphy                                                        |
| Elizabeth Salter                                                    |
| Katherine Skinner                                                   |
| Philip Taylor                                                       |
| Oto Velicka                                                         |
| <b>Oxford Biomedica</b>                                             |
| Andy Lewin                                                          |
| James Miskin                                                        |
| Pippa Radcliffe                                                     |
| Jason Slingsby                                                      |
| <b>Oxford Research Services (Contracts)</b>                         |
| Carly Banner                                                        |
| Sally Pelling-Deeves                                                |
| Gary Priest                                                         |
| <b>Oxford University Hospitals NHS Trust</b>                        |
| Monique Andersson                                                   |
| Bruno Holthof                                                       |
| <b>Pall Europe</b>                                                  |
| Clive Glover                                                        |
| Peter Levison                                                       |
| <b>Public Affairs Directorate and Divisional Communication Team</b> |
| Alison Brindle                                                      |
| Alexander Buxton                                                    |
| James Colman                                                        |
| Chris McIntyre                                                      |
| Steve Pritchard                                                     |
| <b>Sartorius</b>                                                    |
| Zander Hack                                                         |
| <b>VMIC</b>                                                         |

|                 |
|-----------------|
| Simon Hoffman   |
| Simon McEwen    |
| Rachael Robbins |
